# Supplementary material
Source: publisher site journal article supplement (https://www.dovepress.com/article/264580)
Supplement: Supplementary file 1 [file get_supplementary_file.php]

**READ codes for asthma and/or COPD and asthma-COPD overlap in the CPRD**

| <b>Read Code</b> | <b>Description/Read Term</b>                          |
|------------------|-------------------------------------------------------|
| H331.00          | Intrinsic Asthma                                      |
| 66YP.00          | Asthma night-time symptoms                            |
| H330.11          | Allergic asthma                                       |
| H330.12          | Childhood asthma                                      |
| H330.13          | Hay fever with asthma                                 |
| H330.14          | Pollen asthma                                         |
| H35y600          | Sequoiosis (red-cedar asthma)                         |
| 663O.00          | Asthma not disturbing sleep                           |
| 9OJB.00          | Asthma monitoring invit SMS (short message service)   |
| 9NI8.00          | Asthma outreach clinic                                |
| 663e100          | Asthma severely restricts exercise                    |
| 8793.00          | Asthma control step 0                                 |
| 9N1d.00          | Seen in asthma clinic                                 |
| 2126200          | Asthma resolved                                       |
| 173A.00          | Exercise induced asthma                               |
| 66Ys.00          | Asthma never causes night symptoms                    |
| 663t.00          | Asthma causes daytime symptoms 1 to 2 times per month |
| 663..11          | Asthma monitoring                                     |
| 663q.00          | Asthma daytime symptoms                               |
| H33z000          | Status asthmaticus NOS                                |
| 8798.00          | Asthma control step 5                                 |
| 663h.00          | Asthma – currently dormant                            |
| 663n.00          | Asthma treatment compliance satisfactory              |
| 9OJA.11          | Asthma monitored                                      |
| 661M100          | Asthma self-management plan agreed                    |
| 663e.00          | Asthma restricts exercise                             |
| 663V200          | Moderate asthma                                       |
| H33..11          | Bronchial asthma                                      |
| 388t.00          | Royal college of physicians asthma                    |
| 68C3.00          | Asthma screening                                      |
| 9OJ6.00          | Asthma monitor 3 <sup>rd</sup> letter                 |
| 66Yz500          | Telehealth asthma monitoring                          |
| H335.00          | Chronic asthma with fixed airflow                     |
| H330.00          | Extrinsic (atopic) asthma                             |
| 663V300          | Severe asthma                                         |
| 1784.00          | Asthma trigger – emotion                              |
| 66YQ.00          | Asthma monitoring by nurse                            |
| 661N100          | Asthma self-management plan review                    |
| 663w.00          | Asthma limits walking up hills or stairs              |
| 679J000          | Health education - asthma self management             |
| 663u.00          | Asthma causes daytime symptoms 1 to 2 times per week  |
| H33z100          | Asthma attack                                         |
| 66YE.00          | Asthma monitoring due                                 |
| 663O000          | Asthma never disturbs sleep                           |
| H330000          | Extrinsic asthma without status asthmaticus           |
| 1O2..00          | Asthma confirmed                                      |
| 66YR.00          | Asthma monitoring by doctor                           |
| H333.00          | Acute exacerbation of asthma                          |
| H47y000          | Detergent asthma                                      |
| H331111          | Intrinsic asthma with asthma attack                   |

|         |                                                              |
|---------|--------------------------------------------------------------|
| 9hA..00 | Exception reporting: asthma quality indicators               |
| H33..00 | Asthma                                                       |
| H33z200 | Late-onset asthma                                            |
| 8CR0.00 | Asthma clinical management plan                              |
| 8HTT.00 | Referral to asthma clinic                                    |
| 8791.00 | Further asthma - drug prevent                                |
| 8797.00 | Asthma control step 4                                        |
| 8B3j.00 | Asthma medication review                                     |
| 663r.00 | Asthma causes night symptoms 1 to 2 times per month          |
| TJF7300 | Adverse reaction to theophylline (asthma)                    |
| 663x.00 | Asthma limits walking on the flat                            |
| 1783.00 | Asthma trigger - warm air                                    |
| 1781.00 | Asthma trigger – pollen                                      |
| 1787.00 | Asthma trigger – seasonal                                    |
| H33z.00 | Asthma unspecified                                           |
| H332.00 | Mixed asthma                                                 |
| H334.00 | Brittle asthma                                               |
| 178..00 | Asthma trigger                                               |
| H33z111 | Asthma attack NOS                                            |
| 663s.00 | Asthma never causes daytime symptoms                         |
| 663P200 | Asthma limits activities most days                           |
| 663V000 | Occasional asthma                                            |
| H312000 | Chronic asthmatic bronchitis                                 |
| H33zz12 | Allergic asthma NEC                                          |
| H33zz11 | Exercise induced asthma                                      |
| 9OJ3.00 | Asthma monitor offer default                                 |
| 66Y9.00 | Step up change in asthma management plan                     |
| 1785.00 | Asthma trigger – damp                                        |
| 663N100 | Asthma disturbs sleep weekly                                 |
| 9OJB000 | Asthma monitoring SMS text message 1st invitation            |
| 173c.00 | Occupational asthma                                          |
| H331100 | Intrinsic asthma with status asthmaticus                     |
| 663P.00 | Asthma limiting activities                                   |
| 663V.00 | Asthma severity                                              |
| 38DT.00 | Asthma control questionnaire                                 |
| 663P100 | Asthma limits activities 1 to 2 times per week               |
| 8795.00 | Asthma control step 2                                        |
| 66Yp.00 | Asthma review using Roy Colleg of Physicians three questions |
| H330111 | Extrinsic asthma with asthma attack                          |
| 663m.00 | Asthma accident and emergency attendance since last visit    |
| 663y.00 | Number of asthma exacerbations in past year                  |
| 663V100 | Mild asthma                                                  |
| 1782.00 | Asthma trigger - tobacco smoke                               |
| 1780.00 | Aspirin induced asthma                                       |
| H3B..00 | Asthma-chronic obstructive pulmonary disease overlap syndrom |
| 663N000 | Asthma causing night waking                                  |
| 9OJB100 | Asthma monitoring SMS text message 2nd invitation            |
| H331000 | Intrinsic asthma without status asthmaticus                  |
| G581.11 | Asthma – cardiac                                             |
| H330100 | Extrinsic asthma with status asthmaticus                     |
| 9OJ5.00 | Asthma monitor 2nd letter                                    |
| 9OJ9.00 | Asthma monitoring deleted                                    |
| 663P000 | Asthma limits activities 1 to 2 times per month              |

|         |                                                             |
|---------|-------------------------------------------------------------|
| 8796.00 | Asthma control step 3                                       |
| 8794.00 | Asthma control step 1                                       |
| 13Y4.00 | Asthma society member                                       |
| 1J70.00 | Suspected asthma                                            |
| 8CMA000 | Patient has a written asthma personal action plan           |
| 9OJ..11 | Asthma clinic administration                                |
| H331.11 | Late onset asthma                                           |
| 66YK.00 | Asthma follow-up                                            |
| 9hA1.00 | Excepted from asthma quality indicators: Patient unsuitable |
| TJF7z00 | Adverse reaction to antiasthmatic NOS                       |
| 66Y5.00 | Change in asthma management plan                            |
| TJF7.00 | Adverse reaction to antiasthmatics                          |
| 663N.00 | Asthma disturbing sleep                                     |
| 663W.00 | Asthma prophylactic medication used                         |
| 9OJA.00 | Asthma monitoring check done                                |
| 9OJC.00 | Asthma monitoring invitation email                          |
| H330z00 | Extrinsic asthma NOS                                        |
| 38B8.00 | Severe asthma exacerbation risk assessment                  |
| 66Yq.00 | Asthma causes night time symptoms 1 to 2 times per week     |
| 14Ok000 | At risk of severe asthma exacerbation                       |
| 173d.00 | Work aggravated asthma                                      |
| 178B.00 | Asthma trigger – exercise                                   |
| 66Yr.00 | Asthma causes symptoms most nights                          |
| 9OJZ.00 | Asthma monitoring admin.NOS                                 |
| 9OJ2.00 | Refuses asthma monitoring                                   |
| 9NNX.00 | Under care of asthma specialist nurse                       |
| 1788.00 | Asthma trigger - cold air                                   |
| 6AP..00 | Review of patient at risk of asthma                         |
| 66YC.00 | Absent from work or school due to asthma                    |
| U60F61A | [X] Adverse reaction to antiasthmatic NOS                   |
| U60F615 | [X] Adverse reaction to theophylline - asthma               |
| U60F611 | [X] Adverse reaction to antiasthmatics                      |
| 663p.00 | Asthma treatment compliance unsatisfactory                  |
| 663v.00 | Asthma causes daytime symptoms most days                    |
| H35y700 | Wood asthma                                                 |
| 66Yz000 | Asthma management plan declined                             |
| 663N200 | Asthma disturbs sleep frequently                            |
| 663j.00 | Asthma - currently active                                   |
| 178A.00 | Asthma trigger - airborne dust                              |
| 663e000 | Asthma sometimes restricts exercise                         |
| 663f.00 | Asthma never restricts exercise                             |
| H331z00 | Intrinsic asthma NOS                                        |
| H33z011 | Severe asthma attack                                        |
| 9hA2.00 | Excepted from asthma quality indicators: Informed dissent   |
| 1789.00 | Asthma trigger - respiratory infection                      |
| 663Q.00 | Asthma not limiting activities                              |
| 9OJ..00 | Asthma monitoring admin                                     |
| 212G.00 | Asthma resolved                                             |
| H330011 | Hay fever with asthma                                       |
| 9OJ7.00 | Asthma monitor verbal invite                                |
| 9OJ1.00 | Attends asthma monitoring                                   |
| 663U.00 | Asthma management plan given                                |
| 9OJ8.00 | Asthma monitor phone invite                                 |

|             |                                                              |
|-------------|--------------------------------------------------------------|
| 90J4.00     | Asthma monitor 1st letter                                    |
| 66YA.00     | Step down change in asthma management plan                   |
| 8H2P.00     | Emergency admission, asthma                                  |
| 66Yu.00     | Number days absent from school due to asthma in past 6 month |
| 66YJ.00     | Asthma annual review                                         |
| 663d.00     | Emergency asthma admission since last appointment            |
| 1786.00     | Asthma trigger – animals                                     |
|             |                                                              |
| <b>COPD</b> |                                                              |
| 9h51.00     | Excepted from COPD quality indicators: Patient unsuitable    |
| 9h52.00     | Excepted from COPD quality indicators: Informed dissent      |
| 9kf2.00     | COPD structured smoking assessment declined - enh serv admin |
| 8H2R.00     | Admit COPD emergency                                         |
| 661N300     | COPD self-management plan review                             |
| 9h5..00     | Exception reporting: COPD quality indicators                 |
| 66Yf.00     | Number of COPD exacerbations in past year                    |
| 9NgP.11     | On COPD (chr obstruc pulmonary disease) supportv cre pathway |
| 8CeD.00     | Preferred place of care for next exacerbation of COPD        |
| 9e03.00     | GP OOH service notified of COPD care plan                    |
| 66Yi.00     | Multiple COPD emergency hospital admissions                  |
| 66Yl.00     | COPD self-management plan given                              |
| 8Hkw.00     | Referral to COPD community nursing team                      |
|             |                                                              |
| 66YL.11     | COPD follow-up                                               |
| 9kf..00     | COPD - enhanced services administration                      |
| 9kf1.00     | Refer COPD structured smoking assessment - enhanc serv admin |
| 661M300     | COPD self-management plan agreed                             |
| 66Ye.00     | Emergency COPD admission since last appointment              |
| 9kf0.11     | COPD patient unsuitable for pulmonary rehabilitation         |
| 66Yd.00     | COPD accident and emergency attendance since last visit      |
| 9kf1.11     | Referred for COPD structured smoking assessment              |
| 9kf0.00     | COPD patient unsuitable for pulmonary rehab - enh serv admin |
| 9Oi1.00     | Chronic obstructive pulmonary disease monitoring 2nd letter  |
| 8IEZ.00     | Chronic obstructive pulmonary disease rescue pack declined   |
| 9Oi2.00     | Chronic obstructive pulmonary disease monitoring 3rd letter  |
| H36..00     | Mild chronic obstructive pulmonary disease                   |
| 38Dg.00     | Chronic obstructive pulmonary disease assessment test        |
| 66Yg.00     | Chronic obstructive pulmonary disease disturbs sleep         |
| 8CE6.00     | Chronic obstructive pulmonary disease leaflet given          |
| 66YD.00     | Chronic obstructive pulmonary disease monitoring due         |
| H37..00     | Moderate chronic obstructive pulmonary disease               |
| H38..00     | Severe chronic obstructive pulmonary disease                 |
|             |                                                              |
| 9Oi3.00     | Chronic obstructive pulmonary disease monitoring verb invite |
| 9Oi..00     | Chronic obstructive pulmonary disease monitoring admin       |
| 66YT.00     | Chronic obstructive pulmonary disease monitoring by doctor   |
| 9Oi4.00     | Chronic obstructive pulmonary disease monitor phone invite   |
| 14OJ.00     | At risk of chronic obstructive pulmonary disease             |
| 9NgP.00     | On chronic obstructive pulmonary disease supprtv cre pathway |
| H3y..11     | Other specified chronic obstructive pulmonary disease        |

|         |                                                                |
|---------|----------------------------------------------------------------|
| 2126F00 | Chronic obstructive pulmonary disease resolved                 |
| 8CMV.00 | Has chronic obstructive pulmonary disease care plan            |
| 9Nk7000 | Seen in chronic obstructive pulmonary disease clinic           |
| 38Dd.00 | Clinical chronic obstructive pulmonary disease questionnaire   |
| 1170.00 | Chronic obstructive pulmonary disease excluded by spirometry   |
| 8CR1.00 | Chronic obstructive pulmonary disease clinical management plan |
| 679V.00 | Health education - chronic obstructive pulmonary disease       |
| 1J71.00 | Suspected chronic obstructive pulmonary disease                |
|         | February 2009                                                  |
| H39..00 | Very severe chronic obstructive pulmonary disease              |
| 66YS.00 | Chronic obstructive pulmonary disease monitoring by nurse      |
| 66YL.00 | Chronic obstructive pulmonary disease follow-up                |
| 66Yh.00 | Chronic obstructive pulmonary disease does not disturb sleep   |
| 9Oi0.00 | Chronic obstructive pulmonary disease monitoring 1st letter    |
| 8CMW500 | Chronic obstructive pulmonary disease care pathway             |
| 8BMW.00 | Issue of chronic obstructive pulmonary disease rescue pack     |
| 66YB200 | Telehealth chronic obstructive pulmonary disease monitoring    |
| 66YB.00 | Chronic obstructive pulmonary disease monitoring               |
| H3...00 | Chronic obstructive pulmonary disease                          |
| 66YM.00 | Chronic obstructive pulmonary disease                          |
| Hyu3100 | [X]Other specified chronic obstructive pulmonary disease       |
| 66YB100 | Chronic obstructive pulmonary disease 6 monthly review         |
| 66YB100 | Chronic obstructive pulmonary disease 3 monthly review         |
| H3z..11 | Chronic obstructive pulmonary disease NOS                      |
| H3...11 | Chronic obstructive airways disease NOS                        |
| H3y..00 | Other specified chronic obstructive airways disease            |
| H3A..00 | End stage chronic obstructive airways disease                  |
| 119     |                                                                |
| 663K.00 | Airways obstructn irreversible                                 |
|         | February                                                       |
| H312200 | Acute exacerbation of chronic obstructive airways disease      |
| H312200 | Chronic obstructive airways disease                            |

**Gemscript Codes to identify asthma and/or COPD and asthma-COPD overlap medications in the CPRD**

| <b>prodcode</b> | <b>gemscriptcode</b> | <b>Productname</b>                                                                                                                                  | <b>drugsubstance</b>          |
|-----------------|----------------------|-----------------------------------------------------------------------------------------------------------------------------------------------------|-------------------------------|
| 47638           | 00402021             | Neovent 25microgram/dose Inhaler CFC (Kent Pharmaceuticals Ltd) salmeterol xinafoate                                                                | Salmeterol Xinafoate          |
| 35165           | 92979020             | Serevent 50microgram disks with Diskhale (GlaxoSmithKline UK Ltd) Salmeterol xinafoate                                                              | Salmeterol Xinafoate          |
| 7270            | 90173020             | Salmeterol 25microgram/dose inhaler CFC free salmeterol xinafoate 25microgram/actuation                                                             | Salmeterol Xinafoate          |
| 549             | 74018020             | Serevent 25microgram/dose inhaler (GlaxoSmithKline UK Ltd) salmeterol xinafoate                                                                     | Salmeterol Xinafoate          |
| 57694           | 16929021             | Vertine 25microgram/dose inhaler CFC free (Teva UK Ltd) salmeterol xinafoate                                                                        | Salmeterol Xinafoate          |
| 2224            | 74020020             | Serevent 50microgram/dose Accuhaler (GlaxoSmithKline UK Ltd) salmeterol xinafoate                                                                   | Salmeterol Xinafoate          |
| 54742           | 4199020              | Salmeterol 25microgram/dose inhaler CFC free (A A H Pharmaceuticals Ltd) salmeterol                                                                 | Salmeterol Xinafoate          |
| 50051           | 21883020             | Serevent 25microgram/dose Evohaler (Waymade Health Care Plc) salmeterol xinafoate                                                                   | Salmeterol Xinafoate          |
| 35825           | 92985020             | Serevent 50microgram disks (GlaxoSmithKline UK Ltd) salmeterol xinafoate 50microgram                                                                | Salmeterol Xinafoate          |
| 57544           | 02702020             | Serevent 50microgram/dose Accuhaler (Waymade Health Care Plc) salmeterol xinafoate                                                                  | Salmeterol Xinafoate          |
| 719             | 74015020             | Salmeterol 50microgram/dose dry powder inhaler salmeterol xinafoate 50microgram/1 dose                                                              | Salmeterol Xinafoate          |
| 465             | 74013020             | Salmeterol 25microgram/dose inhaler salmeterol xinafoate 25microgram/1 dose                                                                         | Salmeterol Xinafoate          |
| 35503           | 92977020             | Salmeterol 50microgram inhalation powder blisters salmeterol xinafoate 50microgram                                                                  | Salmeterol Xinafoate          |
| 35542           | 9291020              | 50microgram inhalation powder blisters with device salmeterol xinafoate                                                                             | Salmeterol Xinafoate          |
| 56478           | 02704020             | Serevent 50microgram/dose Accuhaler (DE Pharmaceuticals) salmeterol xinafoate                                                                       | Salmeterol Xinafoate          |
| 3297            | 74014020             | Salmeterol 50micrograms disk salmeterol xinafoate 50microgram Disc inhalation                                                                       | Salmeterol Xinafoate          |
| 910             | 74019020             | Serevent diskhaler 50microgram inhalation powder (Glaxo Welldone UK Ltd) Salmeterol                                                                 | Salmeterol Xinafoate          |
| 37432           | 94307020             | Fostair 100micrograms/dose / 6micrograms/dose inhaler (Chiesi Ltd) Formoterol Fumarate<br><br>Formoterol fumarate                                   | Formoterol fumarate dihydrate |
| 6525            | 80413020             | Formoterol 12microgram inhalation powder capsules with device Formoterol Fumarate dihydrate<br><br>Formoterol fumarate dihydrate<br><br>12microgram | Formoterol fumarate dihydrate |
| 66448           | 52510021             | Flutiform 250micrograms/dose / 10micrograms/dose inhaler (Waymade Healthcare Plc)                                                                   | Formoterol fumarate dihydrate |
| 1975            | 85747020             | Oxis 6 Turbohaler (AstraZeneca UK Ltd) Formoterol fumarate dehydrate 6microgram/1dose inhalation                                                    | Formoterol fumarate dihydrate |

|       |          |                                                                                                                                                                                |                               |
|-------|----------|--------------------------------------------------------------------------------------------------------------------------------------------------------------------------------|-------------------------------|
|       |          | Formoterol fumarate dihydrate<br>6microgram/1dose<br>Inhalation<br>Oxi                                                                                                         |                               |
| 66547 | 02723020 | Oxis 12 Turbohaler (DE Pharmaceuticals) Formoterol fumarate dehydrate 12microgram/1dose<br>Formoterol fumarate dihydrate<br>12microgram/1dose                                  | Formoterol fumarate dihydrate |
| 35725 | 92823020 | Formoterol Easyhaler 12micrograms/dose dry powder inhaler (Orion Pharma (UK) Ltd)                                                                                              | Formoterol fumarate dihydrate |
| 10968 | 80411020 | Foradil 12microgram inhalation powder capsules with device (Novartis Pharmaceuticals UK Ltd) Formoterol                                                                        | Formoterol fumarate dihydrate |
| 57558 | 02718020 | Oxis 6 Turbohaler (Lexon (UK) Ltd) Formoterol fumarate dihydrate 6microgram/1dose Inhalation powder                                                                            | Formoterol fumarate dihydrate |
| 62535 | 44185021 | Duaklir 340micrograms/dose / 12micrograms/dose Genuair (AstraZeneca UK Ltd) Formoterol fumarate                                                                                | Formoterol fumarate dihydrate |
| 7133  | 85743020 | Formoterol 12micrograms/dose dry powder inhaler Formoterol dihydrate 12microgram/1dose<br>Formoterol fumarate dihydrate<br>12microgram/1dose                                   | Formoterol fumarate dihydrate |
| 67238 | 32398020 | Foradil 12microgram inhalation powder capsules with device (Sigma Pharmaceuticals Plc) Formoterol fumarate                                                                     | Formoterol fumarate dihydrate |
| 1974  | 85749020 | Oxis 12 Turbohaler (AstraZeneca UK Ltd) Formoterol fumarate dehydrate 12microgram/1dose inhalation powder<br>Formoterol fumarate dihydrate 12microgram/1dose Inhalation powder | Formoterol fumarate dihydrate |
| 9711  | 85742020 | Formoterol 6micrograms/dose dry powder inhaler Formoterol fumarate dihydrate 6microgram/1dose Inhalation powder<br>Inhalation                                                  | Formoterol fumarate dihydrate |
| 25784 | 89766020 | Atimos Modulite 12micrograms/dose inhaler (Chiesi Ltd) Formoterol fumarate dihydrate 12microgram/1dose Pressurised inhalation<br>Inhalation                                    | Formoterol fumarate dihydrate |
| 14306 | 89764020 | Formoterol 12micrograms/dose inhaler CFC free Formoterol Fumarate Dihydrate 12micrograms/actuation Inhaler Cfc-free<br>Inhalation                                              | Formoterol fumarate dihydrate |
| 56482 | 02721020 | Oxis 12 Turbohaler (Waymade Healthcare Plc) Formoterol fumarate dihydrate 12microgram/1dose Inhalation powder                                                                  | Formoterol fumarate dihydrate |
| 1957  | 52235020 | Ventolin 5mg Nebules (GlaxoSmithKline UK Ltd) Salbutamol sulfate 2mg/1ml Nebuliser liquid Inhalation<br>Selective Beta 2 Agonists                                              | Salbutamol sulfate            |
| 16577 | 88298020 | Easyhaler Salbutamol sulfate 200micrograms/dose dry powder inhaler (Orion Pharma (UK) Ltd) Salbutamol 200microgram/1dose<br>Inhalation powder                                  | Salbutamol sulfate            |

|       |          |                                                                                                                                          |                    |
|-------|----------|------------------------------------------------------------------------------------------------------------------------------------------|--------------------|
| 42830 | 98212020 | Ventolin 100micrograms/dose Evohaler (GlaxoSmithKline UK Ltd)<br>Salbutamol sulfate 100microgram/1dose Pressurised inhalation            | Salbutamol sulfate |
| 48741 | 02651020 | Ventolin 100micrograms/dose Evohaler (Mawdsley-Brooks & Company Ltd) Salbutamol sulfate<br><br>100microgram/1dose Pressurised inhalation | Salbutamol sulfate |
| 882   | 67866020 | Salbutamol 200microgram inhalation powder capsules Salbutamol sulfate 200microgram Inhalation powder                                     | Salbutamol sulfate |
| 30212 | 53424020 | Salbutamol cyclohaler Salbutamol Sulphate Cyclohaler                                                                                     | Salbutamol sulfate |
| 8     | 59553020 | Salbutamol 100microgram/1dose Pressurised inhalation                                                                                     | Salbutamol sulfate |
| 510   | 52229020 | Ventolin 5mg/ml respirator solution (GlaxoSmithKline UK Ltd)<br><br>5mg/1ml<br><br>Nebuliser liquid                                      | Salbutamol sulfate |
| 49591 | 02653020 | Salbutamol 100micrograms/dose inhaler CFC free (Sandoz Ltd)<br>Salbutamol sulfate<br><br>100microgram/1dose Pressurised inhalation       | Salbutamol sulfate |
| 5753  | 69628020 | Salbutamol 400micrograms disc Salbutamol Sulphate<br>400micrograms<br><br>Disc Inhalation                                                | Salbutamol sulfate |
| 34311 | 50518020 | Salbutamol 100microgram/inhalation Inhalation powder (Berk Pharmaceuticals Ltd)<br><br>Salbutamol                                        | Salbutamol sulfate |
| 1741  | 86841020 | Salbutamol 100micrograms/dose breath actuated inhaler CFC free<br>Salbutamol sulfate                                                     | Salbutamol sulfate |
| 7935  | 70528020 | Maxivent 100microgram/inhalation Inhalation powder (Ashbourne Pharmaceuticals Ltd)                                                       | Salbutamol sulfate |
| 3443  | 81503020 | Salbutamol 100microgram/inhalation Spacehaler (Celltech Pharma Europe Ltd)                                                               | Salbutamol sulfate |
| 34162 | 59498020 | Salbutamol 2.5mg/2.5ml Nebuliser liquid (Galen Ltd)                                                                                      | Salbutamol sulfate |
| 53297 | 02658020 | Ventolin 200micrograms/dose Accuhaler (Sigma Pharmaceuticals Plc)                                                                        | Salbutamol sulfate |
| 31    | 52213020 | Ventolin 100microgram/inhalation Inhalation powder (Glaxo Wellcome UK Ltd)                                                               | Salbutamol sulfate |
| 48742 | 02645020 | Ventodisks 400microgram (GlaxoSmithKline UK Ltd)                                                                                         | Salbutamol sulfate |
| 942   | 68159020 | Aerolin 100micrograms/dose Autohaler (3M Health Care Ltd)                                                                                | Salbutamol sulfate |
| 3163  | 69627020 | Salbutamol 200micrograms disc Salbutamol Sulphate<br>200micrograms<br><br>Disc Inhalation                                                | Salbutamol sulfate |
| 5889  | 79551020 | Salamol 100microgram/inhalation Inhalation powder (Kent Pharmaceuticals Ltd)                                                             | Salbutamol sulfate |
| 9651  | 85793020 | Asmasal 100microgram/inhalation Spacehaler (Celltech Pharma Europe Ltd)                                                                  | Salbutamol sulfate |
| 17    | 59554020 | Salbutamol 100micrograms/dose inhaler CFC free Salbutamol sulfate 100microgram/1dose Pressurised inhalation                              | Salbutamol sulfate |
| 5170  | 81157020 | Salamol 100micrograms/dose inhaler CFC free (Teva UK Ltd)                                                                                | Salbutamol sulfate |
| 1950  | 68215020 | Ventodisks 400microgram/blister Disc (Allen & Hanburys Ltd)                                                                              | Salbutamol sulfate |
| 66793 | 69338020 | Salbutamol rondo 100micrograms/actuation inhaler and spacer                                                                              | Salbutamol sulfate |
| 14525 | 80501020 | Salbutamol 100micrograms/inhalation vortex inhaler                                                                                       | Salbutamol sulfate |
| 22512 | 16452101 | SALBUTAMOL Inhaler                                                                                                                       | Salbutamol sulfate |



|        |          |                                                                                                       |                    |
|--------|----------|-------------------------------------------------------------------------------------------------------|--------------------|
| 30118  | 61514020 | Salbutamol 100micrograms/dose inhaler CFC free (Teva UK Ltd)                                          | Salbutamol sulfate |
| 49370  | 02643020 | Ventodisks 200microgram (GlaxoSmithKline UK Ltd)                                                      | Salbutamol sulfate |
| 1882   | 68214020 | Ventodisks 200microgram/blister Disc (Allen & Hanburys Ltd)                                           | Salbutamol sulfate |
| 58269  | 16419021 | AirSalb 100micrograms/dose inhaler CFC free (Sandoz Ltd)                                              | Salbutamol sulfate |
| 50315  | 02638020 | Salbutamol 200microgram inhalation powder blisters with device                                        | Salbutamol sulfate |
|        |          | Salbutamol sulfate                                                                                    |                    |
| 30240  | 68160020 | Aerolin autohaler 100microgram/actuation Pressurised inhalation (3M Health Care Ltd)                  | Salbutamol sulfate |
| 20675  | 19131025 | SALBUTAMOL ROTAHALER COMPLETE UNIT                                                                    | Salbutamol sulfate |
| 27793  | 70349020 | Salbutamol cyclohaler type 5 insufflator Inhalation powder (Bristol-Myers Squibb Pharmaceuticals Ltd) | Salbutamol sulfate |
| 50503  | 02659020 | Ventolin 200micrograms/dose Accuhaler (Mawdsley-Brooks & Company Ltd)                                 | Salbutamol sulfate |
| 33817  | 63650020 | Salbutamol 100micrograms/dose inhaler CFC free (Actavis UK Ltd)                                       | Salbutamol sulfate |
|        |          | Salbutamol sulfate                                                                                    |                    |
| 66395  | 57278021 | Salbutamol 100micrograms/dose inhaler CFC free (Mawdsley-Brooks & Company Ltd)                        | Salbutamol sulfate |
| 22430  | 84022020 | Spacehaler salbutamol 100microgram/inhalation Spacehaler (Celltech Pharma Europe Ltd)                 | Salbutamol sulfate |
| 34702  | 50525020 | Salbutamol 100microgram/inhalation Inhalation powder(C P Pharmaceuticals Ltd)                         | Salbutamol sulfate |
| 60923  | 02661020 | Salamol 100micrograms/dose Easi-Breathe inhaler (DE Pharmaceuticals)                                  | Salbutamol sulfate |
| 25218  | 18504810 | SALBUTAMOL CFC/FREE B/A                                                                               | Salbutamol sulfate |
| 48809  | 02641020 | Ventodisks 400microgram with Diskhaler (GlaxoSmithKline UK Ltd)                                       | Salbutamol sulfate |
| 34310  | 61776020 | Salbutamol 100micrograms/dose inhaler CFC free (A A H Pharmaceuticals Ltd)                            | Salbutamol sulfate |
| 64801  | 02646020 | Salbutamol 100micrograms/dose inhaler CFC free (Mylan Ltd)                                            | Salbutamol sulfate |
| 113181 | 88296020 | Easyhaler Salbutamol sulfate 100micrograms/dose dry powder inhaler (Orion Pharma (UK) Ltd)            | Salbutamol sulfate |
| 33373  | 63926020 | Salbutamol 200 Cyclocaps (Teva UK Ltd) Salbutamol sulfate                                             | Salbutamol sulfate |
| 898    | 52215020 | Ventolin evohaler 100 100microgram/inhalation Pressurised inhalation (Glaxo Wellcome UK Ltd)          | Salbutamol sulfate |
| 44713  | 50537020 | Salbutamol 100microgram/inhalation Inhalation powder (Celltech Pharma Europe Ltd)                     | Salbutamol sulfate |
| 5740   | 79575020 | Airomir 100micrograms/dose Autohaler (Teva UK Ltd)                                                    | Salbutamol sulfate |
| 5516   | 79690020 | Salamol 100micrograms/dose Easi-Breathe inhaler (Teva UK Ltd)                                         | Salbutamol sulfate |
| 67040  | 02647020 | Salbutamol 100micrograms/dose inhaler CFC free (Alliance Healthcare (Distribution) Ltd)               | Salbutamol sulfate |
| 38079  | 94863020 | Salbutamol 100micrograms/dose dry powder inhalation cartridge with device                             | Salbutamol sulfate |
| 30230  | 79713020 | Salbutamol 100micrograms/actuation breath actuated inhaler                                            | Salbutamol sulfate |
| 2978   | 69894020 | Salbutamol 200micrograms/dose dry powder inhaler                                                      | Salbutamol sulfate |
| 52543  | 02644020 | Salbutamol 400microgram inhalation powder blisters                                                    | Salbutamol sulfate |
| 1952   | 52219020 | Ventolin 400microgram Rotacaps (GlaxoSmithKline UK Ltd)                                               | Salbutamol sulfate |
| 49368  | 02639020 | Ventodisks 200microgram with Diskhaler (GlaxoSmithKline UK Ltd)                                       | Salbutamol sulfate |
| 958    | 84965020 | Ventolin easi-breathe 100microgram/actuation Pressurised inhalation (Allen & Hanburys Ltd)            | Salbutamol sulfate |
| 34134  | 68156020 | Aerolin 400 100microgram/actuation Inhalation powder (3M Health Care Ltd)                             | Salbutamol sulfate |

|       |          |                                                                                                  |                    |
|-------|----------|--------------------------------------------------------------------------------------------------|--------------------|
| 31933 | 50543020 | Salbutamol 100micrograms/dose inhaler (A A H Pharmaceuticals Ltd)                                | Salbutamol sulfate |
| 48519 | 02648020 | Ventolin 100micrograms/dose Evohaler (Waymade Healthcare Plc)                                    | Salbutamol sulfate |
| 40655 | 69361020 | Salbuvent 100microgram/actuation Inhalation powder (Pharmacia Ltd)                               | Salbutamol sulfate |
| 42858 | 98214020 | Ventolin 200micrograms/dose Accuhaler (GlaxoSmithKline UK Ltd)                                   | Salbutamol sulfate |
|       |          | Salbutamol                                                                                       |                    |
| 13038 | 83865020 | Pulvinal Salbutamol 200micrograms/dose dry powder inhaler (Chiesi Ltd)                           | Salbutamol sulfate |
| 28508 | 54287020 | Salbutamol 100microgram/inhalation Inhalation powder (IVAX Pharmaceuticals UK Ltd)               | Salbutamol sulfate |
| 2850  | 67867020 | Salbutamol 400microgram inhalation powder capsules                                               | Salbutamol sulfate |
| 7017  | 88294020 | Salbutamol 100micrograms/dose dry powder inhaler                                                 | Salbutamol sulfate |
| 66924 | 53356021 | Salbutamol 100micrograms/dose inhaler CFC free (DE Pharmaceuticals)                              | Salbutamol sulfate |
| 66972 | 15632021 | Salbutamol 100micrograms/dose inhaler CFC free (AM Distributions (Yorkshire) Ltd)                | Salbutamol sulfate |
| 38214 | 94865020 | Salbutamol 100micrograms/dose dry powder inhalation cartridge                                    | Salbutamol sulfate |
| 48490 | 02650020 | Ventolin 100micrograms/dose Evohaler (DE Pharmaceuticals)                                        | Salbutamol sulfate |
| 38097 | 56098020 | Salbutamol cyclocaps 200microgram Inhalation powder (DuPont Pharmaceuticals Ltd)                 | Salbutamol sulfate |
| 46551 | 77674020 | Salbutamol 100microgram/inhalation Inhalation powder (Neo Laboratories Ltd)                      | Salbutamol sulfate |
| 4497  | 52214020 | Ventolin accuhaler 200 200microgram/actuation Inhalation powder (Glaxo Wellcome UK Ltd)          | Salbutamol sulfate |
| 13996 | 86269020 | Salamol 100microgram/inhalation Inhalation powder (Sandoz Ltd)                                   | Salbutamol sulfate |
| 4665  | 84485020 | Salbulin 100micrograms/dose inhaler (3M Health Care Ltd)                                         | Salbutamol sulfate |
| 38416 | 56099020 | Salbutamol cyclocaps 400microgram Inhalation powder (DuPont Pharmaceuticals Ltd)                 | Salbutamol sulfate |
| 49369 | 02642020 | Salbutamol 200microgram inhalation powder blisters                                               | Salbutamol sulfate |
| 957   | 79689020 | Salamol easi-breathe 100microgram/actuation Pressurised inhalation (IVAX Pharmaceuticals UK Ltd) | Salbutamol sulfate |
| 34619 | 62351020 | Salbutamol 100microgram/inhalation Inhalation powder (Kent Pharmaceuticals Ltd)                  | Salbutamol sulfate |
| 34029 | 53423020 | Salbutamol 400micrograms inahalation capsules                                                    | Salbutamol sulfate |
| 48547 | 41350020 | Salamol 100micrograms/dose inhaler CFC free (Arrow Generics Ltd)                                 | Salbutamol sulfate |
| 38226 | 94869020 | Salbulin Novolizer 100micrograms/dose inhalation powder refill (Meda Pharmaceuticals Ltd)        | Salbutamol sulfate |
| 38136 | 94867020 | Salbulin Novolizer 100micrograms/dose inhalation powder (Meda Pharmaceuticals Ltd)               | Salbutamol sulfate |
| 61591 | 02652020 | Salbutamol 100micrograms/dose inhaler CFC free (Phoenix Healthcare Distribution Ltd)             | Salbutamol sulfate |
| 57524 | 02655020 | Ventolin 200micrograms/dose Accuhaler (Dowelhurst Ltd)                                           | Salbutamol sulfate |
| 2851  | 52218020 | Ventolin 200microgram Rotacaps (GlaxoSmithKline UK Ltd)                                          | Salbutamol sulfate |
| 33089 | 63418020 | Salbutamol 100micrograms/dose inhaler (Kent Pharmaceuticals Ltd)                                 | Salbutamol sulfate |
| 52799 | 02640020 | Salbutamol 400microgram inhalation powder blisters with device                                   | Salbutamol sulfate |
| 32050 | 63930020 | Salbutamol 400 Cyclocaps (Teva UK Ltd)                                                           | Salbutamol sulfate |
| 1087  | 86061020 | Asmasal 95micrograms/dose Clickhaler (Focus Pharmaceuticals Ltd)                                 | Salbutamol sulfate |
| 2655  | 79415020 | Airomir 100micrograms/dose inhaler (Teva UK Ltd)                                                 | Salbutamol sulfate |
| 31082 | 70320020 | Salbuvent 5mg/ml Respirator solution (Pharmacia Ltd)                                             | Salbutamol sulfate |
| 1698  | 69893020 | Salbutamol 100micrograms/dose breath actuated inhaler                                            | Salbutamol sulfate |

|       |          |                                                                                |                         |
|-------|----------|--------------------------------------------------------------------------------|-------------------------|
| 57249 | 02654020 | Asmavent 100micrograms/dose inhaler CFC free (Kent Pharmaceuticals Ltd)        | Salbutamol sulfate      |
| 6462  | 69895020 | Salbutamol 95micrograms/dose dry powder inhaler<br>Salbutamol sulfate          | Salbutamol sulfate      |
| 50956 | 02657020 | Ventolin 200micrograms/dose Accuhaler (DE Pharmaceuticals)                     | Salbutamol sulfate      |
| 862   | 52877020 | Salbulin Inhalation powder (3M Health Care Ltd)<br>Salbutamol                  | Salbutamol sulfate      |
| 59409 | 47210020 | Salbutamol 100micrograms/dose inhaler CFC free (Waymade Healthcare Plc)        | Salbutamol sulfate      |
| 50557 | 39799020 | Ventolin 200micrograms/dose Accuhaler (Lexon (UK) Ltd)                         | Salbutamol sulfate      |
| 21859 | 57680020 | Asmaven 100microgram Inhalation powder (Berk Pharmaceuticals Ltd)              | Salbutamol sulfate      |
| 1093  | 52885020 | Salamol 100microgram/actuation Inhalation powder (IVAX Pharmaceuticals UK Ltd) | Salbutamol sulfate      |
| 28577 | 52223020 | Ventolin 50microgram/ml Injection (Allen & Hanburys Ltd)                       | Salbutamol sulfate      |
| 33588 | 60625020 | Salbutamol 100micrograms/dose inhaler (Mylan Ltd)                              | Salbutamol sulfate      |
| 30204 | 53422020 | Salbutamol 200micrograms inahalation capsules                                  | Salbutamol sulfate      |
| 7711  | 66883020 | Terbutaline 250micrograms/dose inhaler with spacer                             | Terbutaline sulfate     |
| 235   | 48447020 | Bricanyl 250micrograms/dose inhaler (AstraZeneca UK Ltd)                       | Terbutaline sulfate     |
| 42886 | 98210020 | Bricanyl 500micrograms/dose Turbohaler (AstraZeneca UK Ltd)                    | Terbutaline sulfate     |
| 3763  | 03195007 | TERBUTALINE RESPULES INH                                                       | Terbutaline sulfate     |
| 2758  | 58865020 | Bricanyl Refill canister (AstraZeneca UK Ltd)                                  | Terbutaline sulfate     |
| 67326 | 02685020 | Bricanyl 500micrograms/dose Turbohaler (DE Pharmaceuticals)                    | Terbutaline sulfate     |
| 67543 | 02682020 | Bricanyl 500micrograms/dose Turbohaler (Waymade Healthcare Plc)                | Terbutaline sulfate     |
| 1619  | 74122020 | Terbutaline 500micrograms/dose dry powder inhaler                              | Terbutaline sulfate     |
| 1628  | 66884020 | Terbutaline 250micrograms/actuation refill canister                            | Terbutaline sulfate     |
| 1620  | 66882020 | Terbutaline 250micrograms/dose inhaler                                         | Terbutaline sulfate     |
| 907   | 48448020 | Bricanyl turbohaler 500 500microgram Turbohaler (AstraZeneca UK Ltd)           | Terbutaline sulfate     |
| 52410 | 02688020 | Bricanyl 500micrograms/dose Turbohaler (Necessity Supplies Ltd)                | Terbutaline sulfate     |
| 7954  | 48449020 | Bricanyl 250micrograms/dose spacer inhaler (AstraZeneca UK Ltd)                | Terbutaline sulfate     |
| 1794  | 48393020 | Berotec 100microgram/actuation Inhalation powder (Boehringer Ingelheim Ltd)    | Fenoterol hydrobromide  |
| 4842  | 61821020 | Fenoterol 100microgram/actuation inhaler                                       | Fenoterol hydrobromide  |
| 2020  | 48391020 | Berotec 200micrograms/dose inhaler (Boehringer Ingelheim Ltd)                  | Fenoterol hydrobromide  |
| 5185  | 61819020 | Fenoterol 200micrograms/dose inhaler                                           | Fenoterol hydrobromide  |
| 8572  | 66535020 | Rimiterol inhaler                                                              | Rimiterol hydrobromide  |
| 10858 | 52870020 | Pulmadil auto Inhalation powder (3M Health Care Ltd)                           | Rimiterol hydrobromide  |
| 12563 | 53826020 | Exirel Inhalation powder (3M Health Care Ltd)                                  | Pirbuterol              |
| 16236 | 72193020 | Pirbuterol acetate inhaler                                                     | Pirbuterol              |
| 12486 | 48475020 | Bronchodil 500microgram/dose Inhalation powder (Viatris Pharmaceuticals Ltd)   | Reproterol hydrobromide |
| 15165 | 66477020 | Reproterol 500micrograms/dose inhaler                                          | Reproterol hydrobromide |
| 8508  | 48103020 | Alupent 750microgram/inhalation Inhalation powder (Boehringer Ingelheim Ltd)   | Orciprenaline sulfate   |
| 8151  | 72219020 | Orciprenaline 750micrograms/inhalation Aerosol refill                          | Orciprenaline sulfate   |
| 8149  | 48107020 | Alupent 750microgram/inhalation Aerosol refill (Boehringer Ingelheim Ltd)      | Orciprenaline sulfate   |

|       |          |                                                                                                                                                                                                                                                                                  |                       |
|-------|----------|----------------------------------------------------------------------------------------------------------------------------------------------------------------------------------------------------------------------------------------------------------------------------------|-----------------------|
| 461   | 72218020 | Orciprenaline 750micrograms/inhalation inhaler                                                                                                                                                                                                                                   | Orciprenaline sulfate |
| 1959  | 65884020 | Pulmicort 0.5mg Respules (AstraZeneca UK Ltd) Budesonide<br>250microgram/1ml Nebuliser liquid inhalation<br><br>Inhalation<br><br>250microgram/1ml<br><br>Nebuliser liquid<br><br>Inhalation<br><br>Budesonide<br><br>250microgram/1ml<br><br>Nebuliser liquid<br><br>Inhalation | Budesonide            |
| 49711 | 02876020 | Pulmicort 200micrograms/dose inhaler (AstraZeneca UK Ltd)<br><br>Budesonide 200microgram/1dose Pressurised inhalation Inhalation                                                                                                                                                 | Budesonide            |
| 454   | 53685020 | Pulmicort 200micrograms/dose inhaler (AstraZeneca UK Ltd)<br>Budesonide 200microgram/1dose Pressurised inhalation Inhalation<br><br>Budesonide<br><br>200microgram/1dose<br><br>Pressurised inhalation<br><br>Inhalation                                                         | Budesonide            |
| 17670 | 90421020 | Easyhaler Budesonide 100micrograms/dose dry powder inhaler<br>(Orion Pharma (UK) Ltd)<br><br>Budesonide 100microgram/1dose Inhalation powder<br><br>Inhalation                                                                                                                   | Budesonide            |
| 56498 | 02858020 | Pulmicort 200 Turbohaler (Waymade Healthcare Plc) Budesonide<br>200microgram/1dose Inhalation powder<br><br>Inhalation<br><br>Budesonide 200microgram/1dose Inhalation powder<br><br>Inhalation                                                                                  | Budesonide            |
| 1642  | 52570020 | Budesonide 400micrograms/dose dry powder inhaler Budesonide                                                                                                                                                                                                                      | Budesonide            |
| 35510 | 92711020 | Budesonide 200micrograms/dose dry powder inhalation cartridge<br>with device                                                                                                                                                                                                     | Budesonide            |
| 909   | 64256020 | Budesonide 200micrograms/dose inhaler Budesonide<br><br>200microgram/1dose Pressurised inhalation                                                                                                                                                                                | Budesonide            |

|       |          |                                                                                                                                                                                                                                                   |            |
|-------|----------|---------------------------------------------------------------------------------------------------------------------------------------------------------------------------------------------------------------------------------------------------|------------|
| 2092  | 52569020 | Budesonide 200micrograms/dose dry powder inhaler<br>Budesonide                                                                                                                                                                                    | Budesonide |
| 8433  | 64258020 | Budesonide 100micrograms/actuation inhaler Budesonide<br>100micrograms/actuation Aerosol Inhaler                                                                                                                                                  | Budesonide |
| 67239 | 02867020 | Pulmicort 400 Turbohaler (Waymade Healthcare Plc) Budesonide<br>400microgram/1dose Inhalation powder<br>Inhalation<br>Budesonide 400microgram/1dose Inhalation powder<br>Inhalation Budesonide 400microgram/1dose Inhalation powder<br>Inhalation | Budesonide |
| 3570  | 73584020 | Budesonide 200micrograms/actuation refill canister Budesonide<br>200micrograms/actuation Refill Canister Inhalation                                                                                                                               | Budesonide |
| 16054 | 87972020 | Budesonide 200micrograms/actuation breath actuated powder<br>inhaler<br>Budesonide 200micrograms/actuation Breath Actuated Dry Powder<br>Inhaler<br>Inhalation                                                                                    | Budesonide |
| 39879 | 96157020 | Budesonide 200micrograms/dose inhaler CFC free Budesonide<br>200microgram/1dose Pressurised inhalation Inhalation                                                                                                                                 | Budesonide |
| 908   | 73579020 | Pulmicort 400 Turbohaler (AstraZeneca UK Ltd) Budesonide<br>400microgram/1dose Inhalation powder<br>Inhalation<br>03020000<br>Corticosteroids (for Respiratory Conditions)                                                                        | Budesonide |
| 35724 | 92729020 | Budelin Novolizer 200micrograms/dose inhalation powder refill<br>(Meda Pharmaceuticals Ltd)                                                                                                                                                       | Budesonide |
| 39099 | 96231020 | Pulmicort 100micrograms/dose inhaler CFC free (AstraZeneca UK<br>Ltd) Budesonide<br>100microgram/1dose Pressurised inhalation                                                                                                                     | Budesonide |
| 18537 | 86508020 | Budesonide 200microgram inhalation powder capsules Budesonide<br>200microgram                                                                                                                                                                     | Budesonide |
| 7788  | 52571020 | Budesonide 100micrograms/dose dry powder inhaler Budesonide<br>100microgram/1dose Inhalation powder<br>Inhalation                                                                                                                                 | Budesonide |
| 67322 | 02850020 | Pulmicort 100 Turbohaler (Waymade Healthcare Plc)Budesonide<br>100microgram/1dose Inhalation powder<br>Inhalation                                                                                                                                 | Budesonide |
| 14700 | 73583020 | Budesonide 400micrograms/actuation inhaler Budesonide<br>400micrograms/actuation Aerosol Inhaler                                                                                                                                                  | Budesonide |
| 35631 | 92727020 | Budelin Novolizer 200micrograms/dose inhalation powder (Meda<br>Pharmaceuticals Ltd)Budesonide                                                                                                                                                    | Budesonide |

|       |          |                                                                                                                                   |                        |
|-------|----------|-----------------------------------------------------------------------------------------------------------------------------------|------------------------|
|       |          | 200microgram/1dose<br>Inhalation powder                                                                                           |                        |
| 960   | 73580020 | Pulmicort 100 Turbohaler (AstraZeneca UK Ltd)Budesonide<br>100microgram/1dose Inhalation powder                                   | Budesonide             |
| 23741 | 87974020 | Novolizer budesonide 200microgram/actuation Pressurised<br>inhalation (Meda Pharmaceuticals Ltd)                                  | Budesonide             |
| 35602 | 92719020 | Budesonide 200micrograms/dose dry powder inhalation cartridge<br>Budesonide 200micrograms Dry Powder Inhalation Cartridge(refill) | Budesonide             |
| 959   | 64257020 | Budesonide 50micrograms/dose inhaler Budesonide<br>50microgram/1dose Pressurised inhalation                                       | Budesonide             |
| 60937 | 02859020 | Pulmicort 200 Turbohaler (Dowelhurst Ltd)Budesonide<br>200microgram/1dose Inhalation powder                                       | Budesonide             |
| 40057 | 96233020 | Pulmicort 200micrograms/dose inhaler CFC free(AstraZeneca UK<br>Ltd) Budesonide<br>200microgram/1dose Pressurised inhalation      | Budesonide             |
| 27188 | 90423020 | Easyhaler Budesonide 200micrograms/dose dry powder inhaler<br>(Orion Pharma (UK) Ltd)<br>Budesonide 200microgram/1dose Inhalation | Budesonide             |
| 947   | 73585020 | Budesonide 50micrograms/actuation refill canister Budesonide<br>50micrograms/actuation Refill Canister                            | Budesonide             |
| 10321 | 84348020 | Budesonide 400microgram inhalation powder capsules Budesonide<br>400microgram                                                     | Budesonide             |
| 30649 | 90425020 | Easyhaler Budesonide 400micrograms/dose dry powder inhaler<br>(Orion Pharma (UK) Ltd)<br>Budesonide                               | Budesonide             |
| 67315 | 02866020 | Budesonide 400micrograms/dose Turbohaler (Waymade Healthcare<br>Plc)                                                              | Budesonide             |
| 956   | 73578020 | Pulmicort 200 Turbohaler (AstraZeneca UK Ltd)Budesonide                                                                           | Budesonide             |
| 2125  | 53686020 | Pulmicort 200microgram Refill canister(AstraZeneca UK Ltd)<br>Budesonide                                                          | Budesonide             |
| 4545  | 53691020 | Pulmicort LS 50microgram Refill canister (AstraZeneca UK Ltd)<br>Budesonide<br>50microgram                                        | Budesonide             |
| 39102 | 96155020 | Budesonide 100micrograms/dose inhaler CFC free Budesonide<br>100micrograms                                                        | Budesonide             |
| 1680  | 53690020 | Pulmicort LS 50micrograms/dose inhaler(AstraZeneca UK Ltd)<br>Budesonide                                                          | Budesonide             |
| 37447 | 93259020 | Fluticasone propionate 50microgram inhalation powder blisters<br>Fluticasone propionate                                           | Fluticasone Propionate |
| 1518  | 74986020 | Flixotide 50microgram/actuation Inhalation powder(Allen & Hanburys<br>Ltd)Fluticasone Propionate                                  | Fluticasone Propionate |
| 4131  | 74459020 | Fluticasone 100microgram Disc Fluticasone Propionate<br>100microgram<br>Disc                                                      | Fluticasone Propionate |

|       |          |                                                                                                                                     |                        |
|-------|----------|-------------------------------------------------------------------------------------------------------------------------------------|------------------------|
| 7638  | 74460020 | Fluticasone 250microgram Disc Fluticasone Propionate<br>250microgram Disc Inhalation                                                | Fluticasone Propionate |
| 4688  | 74991020 | Fluticasone 50microgram/actuation Pressurised inhalation<br>Fluticasone Propionate                                                  | Fluticasone Propionate |
| 7948  | 79604020 | Fluticasone propionate 250micrograms/dose dry powder inhaler                                                                        | Fluticasone Propionate |
| 5975  | 76450020 | Fluticasone 125micrograms/dose inhaler CFC free Fluticasone<br>propionate                                                           | Fluticasone Propionate |
| 36021 | 93257020 | Fluticasone propionate 50microgram inhalation powder blisters with<br>device                                                        | Fluticasone Propionate |
| 911   | 79577020 | Flixotide accuhaler 250 250microgram/inhalation Inhalation powder<br>(Allen & Hanburys Ltd)                                         | Fluticasone Propionate |
| 9164  | 75180020 | Fluticasone propionate 50micrograms/dose dry powder inhaler<br><br>Fluticasone propionate                                           | Fluticasone Propionate |
| 42994 | 98222020 | Flixotide 250micrograms/dose Accuhaler (GlaxoSmithKline UK Ltd)                                                                     | Fluticasone Propionate |
| 42928 | 98218020 | Flixotide 100micrograms/dose Accuhaler (GlaxoSmithKline UK Ltd)                                                                     | Fluticasone Propionate |
| 35905 | 93287020 | Fluticasone propionate 250microgram inhalation powder blisters<br><br>Fluticasone propionate                                        | Fluticasone Propionate |
| 35986 | 93265020 | Flixotide 50microgram disks (GlaxoSmithKline UK Ltd) Fluticasone<br>propionate 50microgram<br><br>Inhalation powder 4132            | Fluticasone Propionate |
| 4132  | 74992020 | Fluticasone 125microgram/actuation Pressurised inhalation<br>Fluticasone Propionate                                                 | Fluticasone Propionate |
| 42985 | 98216020 | Flixotide 50micrograms/dose Accuhaler(GlaxoSmithKline UK Ltd)<br>Fluticasone propionate<br><br>50microgram/1dose Inhalation powder  | Fluticasone Propionate |
| 35392 | 93297020 | Flixotide 500microgram disks with Diskhaler(GlaxoSmithKline UK<br>Ltd) Fluticasone propionate<br><br>500microgram Inhalation powder | Fluticasone Propionate |
| 35374 | 93299020 | Flixotide 500microgram disks (GlaxoSmithKline UK Ltd) Fluticasone<br>propionate                                                     | Fluticasone Propionate |
| 5718  | 78907020 | Flixotide 125micrograms/dose Evohaler (GlaxoSmithKline UK Ltd)                                                                      | Fluticasone Propionate |
| 36290 | 93263020 | Flixotide 50microgram disks with Diskhaler (GlaxoSmithKline UK<br>Ltd) Fluticasone propionate                                       | Fluticasone Propionate |
| 2282  | 79605020 | Fluticasone propionate 500micrograms/dose dry powder inhaler                                                                        | Fluticasone Propionate |
| 56484 | 02904020 | Flixotide 250micrograms/dose Accuhaler (Waymade Healthcare Plc)<br><br>Fluticasone propionate                                       | Fluticasone Propionate |
| 7602  | 74458020 | Fluticasone 50microgram Disc Fluticasone Propionate                                                                                 | Fluticasone Propionate |
| 36462 | 93295020 | Fluticasone propionate 500microgram inhalation powder blisters<br><br>Fluticasone propionate                                        | Fluticasone Propionate |
| 5885  | 75181020 | Fluticasone propionate 100micrograms/dose dry powder inhaler<br>Fluticasone propionate                                              | Fluticasone Propionate |
| 53057 | 02951020 | Flixotide 50micrograms/dose Evohaler (Lexon (UK) Ltd)                                                                               | Fluticasone Propionate |
| 57525 | 02909020 | Flixotide 250micrograms/dose Accuhaler (Stephar (U.K.) Ltd)<br>Fluticasone propionate                                               | Fluticasone Propionate |
| 1424  | 74455020 | Flixotide 250microgram Disc (Allen & Hanburys Ltd)<br><br>Fluticasone Propionate                                                    | Fluticasone Propionate |

|       |          |                                                                                                                                                                                                                          |                        |
|-------|----------|--------------------------------------------------------------------------------------------------------------------------------------------------------------------------------------------------------------------------|------------------------|
| 56499 | 02912020 | Flixotide 500micrograms/dose Accuhaler (Waymade Healthcare Plc)<br>Fluticasone propionate<br>500microgram/1dose                                                                                                          | Fluticasone Propionate |
| 5309  | 78909020 | Flixotide 50micrograms/dose Evohaler (GlaxoSmithKline UK Ltd)                                                                                                                                                            | Fluticasone Propionate |
| 35700 | 93293020 | Fluticasone propionate 500microgram inhalation powder blisters with device                                                                                                                                               | Fluticasone Propionate |
| 1426  | 75187020 | Flixotide 500microgram Disc(Allen & Hanburys Ltd) Fluticasone Propionate 500microgram Disc Inhalation                                                                                                                    | Fluticasone Propionate |
| 57555 | 02930020 | Flixotide 125micrograms/dose Evohaler (Dowelhurst Ltd)<br>Fluticasone propionate 125microgram/1dose Pressurised inhalation                                                                                               | Fluticasone Propionate |
| 2951  | 75179020 | Fluticasone 250microgram/actuation Pressurised inhalation<br>Fluticasone Propionate                                                                                                                                      | Fluticasone Propionate |
| 8635  | 74453020 | Flixotide 50microgram Disc (Allen & Hanburys Ltd)<br><br>Fluticasone Propionate 50microgram Disc<br><br>Inhalation                                                                                                       | Fluticasone Propionate |
| 1676  | 74987020 | Flixotide 125microgram/actuation Inhalation powder (Allen & Hanburys Ltd)<br><br>Fluticasone                                                                                                                             | Fluticasone Propionate |
| 49772 | 02943020 | Fluticasone 250micrograms/dose Evohaler (Sigma Pharmaceuticals Plc) Fluticasone propionate                                                                                                                               | Fluticasone Propionate |
| 1412  | 75190020 | Flixotide 250microgram/actuation Inhalation powder (Allen & Hanburys Ltd) Fluticasone Propionate                                                                                                                         | Fluticasone Propionate |
| 43074 | 98224020 | Flixotide 500micrograms/dose Accuhaler (GlaxoSmithKline UK Ltd)<br><br>Fluticasone propionate 500microgram/1dose                                                                                                         | Fluticasone Propionate |
| 56474 | 02932020 | Flixotide 125micrograms/dose Evohaler (DE Pharmaceuticals)                                                                                                                                                               | Fluticasone Propionate |
| 35638 | 93273020 | Fluticasone propionate 100microgram inhalation powder blisters with device                                                                                                                                               | Fluticasone Propionate |
| 36090 | 93281020 | Flixotide 100microgram disks (GlaxoSmithKline UK Ltd) Fluticasone propionate                                                                                                                                             | Fluticasone Propionate |
| 5223  | 76452020 | Fluticasone 50micrograms/dose inhaler CFC free Fluticasone propionate 50microgram/1dose Pressurised inhalation<br><br>Inhalation<br><br>Fluticasone propionate 50microgram/1dose Pressurised inhalation<br><br>Inhalatio | Fluticasone Propionate |
| 3989  | 74454020 | Flixotide 100microgram Disc (Allen & Hanburys Ltd)<br><br>Fluticasone Propionate 100microgram Disc Inhalation                                                                                                            | Fluticasone Propionate |
| 3289  | 74985020 | Flixotide 25micrograms/dose inhaler (GlaxoSmithKline UK Ltd)<br>Fluticasone propionate                                                                                                                                   | Fluticasone Propionate |
| 5683  | 78908020 | Flixotide 250micrograms/dose Evohaler (GlaxoSmithKline UK Ltd)<br>Fluticasone propionate                                                                                                                                 | Fluticasone Propionate |
| 57579 | 02897020 | Flixotide 50micrograms/dose Accuhaler (DE Pharmaceuticals)<br>Fluticasone propionate<br><br>50microgram/1dose                                                                                                            | Fluticasone Propionate |



|       |          |                                                                                                                                                                                               |                        |
|-------|----------|-----------------------------------------------------------------------------------------------------------------------------------------------------------------------------------------------|------------------------|
| 4926  | 75192020 | Flixotide accuhaler 100 100microgram/inhalation Inhalation powder (Allen & Hanburys Ltd)                                                                                                      | Fluticasone Propionate |
| 35611 | 93291020 | Flixotide 250microgram disks (GlaxoSmithKline UK Ltd) Fluticasone propionate 250microgram Inhalation powder                                                                                   | Fluticasone Propionate |
| 16305 | 57311020 | Flixotide 2mg/2ml Nebules (GlaxoSmithKline UK Ltd) Fluticasone propionate 1mg/1ml Nebuliser liquid<br><br>Inhalation<br><br>Fluticasone propionate 1mg/1ml Nebuliser liquid<br><br>Inhalation | Fluticasone Propionate |
| 67237 | 02934020 | Flixotide 125micrograms/dose Evohaler (Lexon (UK) Ltd) Fluticasone propionate                                                                                                                 | Fluticasone Propionate |
| 5822  | 76451020 | Fluticasone 250micrograms/dose inhaler CFC free Fluticasone propionate 250microgram/1dose<br><br>Fluticasone propionate 250microgram/1dose                                                    | Fluticasone Propionate |
| 35772 | 93275020 | Fluticasone propionate 100microgram inhalation powder blisters Fluticasone propionate                                                                                                         | Fluticasone Propionate |
| 2440  | 79578020 | Flixotide accuhaler 500 500microgram/inhalation Inhalation powder (Allen & Hanburys Ltd)                                                                                                      | Fluticasone Propionate |
| 5580  | 75191020 | Flixotide accuhaler 50 50microgram/inhalation Inhalation powder(Allen & Hanburys Ltd)                                                                                                         | Fluticasone Propionate |
| 56475 | 02895020 | Flixotide 50micrograms/dose Accuhaler (Sigma Pharmaceuticals Plc)                                                                                                                             | Fluticasone Propionate |
| 35225 | 93279020 | Flixotide 100microgram disks with Diskhaler (GlaxoSmithKline UK Ltd) Fluticasone propionate<br><br>100microgram                                                                               | Fluticasone Propionate |
| 56477 | 02898020 | Flixotide 100micrograms/dose Accuhaler (Waymade Healthcare Plc) Fluticasone propionate 100microgram/1dose Inhalation powder                                                                   | Fluticasone Propionate |
| 51815 | 02938020 | Flixotide 250micrograms/dose Evohaler (Waymade Healthcare Plc)<br><br>Fluticasone propionate<br><br>250microgram/1dose Pressurised inhalation                                                 | Fluticasone Propionate |
| 2723  | 74990020 | Fluticasone 25micrograms/dose inhaler Fluticasone propionate<br><br>25microgram/1dose Pressurised inhalation<br><br>Fluticasone propionate<br><br>25microgram/1dose Pressurised inhalation    | Fluticasone Propionate |
| 67253 | 02896020 | Flixotide 50micrograms/dose Accuhaler (Mawdsley-Brooks & Company Ltd) Fluticasone propionate 50microgram/1dose                                                                                | Fluticasone Propionate |
| 36401 | 93285020 | Fluticasone propionate 250microgram inhalation powder blisters with device                                                                                                                    | Fluticasone Propionate |
| 35461 | 93289020 | Flixotide 250microgram disks with Diskhaler (GlaxoSmithKline UK Ltd) Fluticasone propionate                                                                                                   | Fluticasone Propionate |
| 7891  | 75184020 | Fluticasone 500microgram Disc Fluticasone Propionate 500microgram<br><br>Disc                                                                                                                 | Fluticasone Propionate |

|       |          |                                                                                                                                                         |                               |
|-------|----------|---------------------------------------------------------------------------------------------------------------------------------------------------------|-------------------------------|
| 14294 | 88500020 | Qvar 50micrograms/dose Easi-Breathe inhaler (Teva UK Ltd)<br>Beclometasone dipropionate                                                                 | Beclometasone<br>Dipropionate |
| 33258 | 60178020 | Beclometasone 250micrograms/dose inhaler (A A H<br>Pharmaceuticals Ltd)                                                                                 | Beclometasone<br>Dipropionate |
| 4759  | 69249020 | Beclometasone 100microgram inhalation powder capsules<br>Beclometasone dipropionate                                                                     | Beclometasone<br>Dipropionate |
| 2148  | 69624020 | Beclometasone 400microgram disc Beclometasone Dipropionate<br>400micrograms Disc<br><br>Beclometasone Dipropionate 400micrograms Disc<br><br>Inhalation | Beclometasone<br>Dipropionate |
| 54399 | 10729020 | Qvar 100 Autohaler (Sigma Pharmaceuticals Plc) Beclometasone<br>dipropionate                                                                            | Beclometasone<br>Dipropionate |
| 57589 | 02831020 | Becloforte 250micrograms/dose inhaler (Dowelhurst Ltd)<br>Beclometasone dipropionate<br><br>250microgram/1dose                                          | Beclometasone<br>Dipropionate |
| 31774 | 58818020 | Beclometasone 50micrograms/dose inhaler(Mylan Ltd)<br>Beclometasone dipropionate 50microgram/1dose Pressurised<br>inhalation                            | Beclometasone<br>Dipropionate |
| 16148 | 91167020 | Clenil Modulite 250micrograms/dose inhaler (Chiesi Ltd)<br>Beclometasone dipropionate<br><br>250microgram/1dose                                         | Beclometasone<br>Dipropionate |
| 1551  | 56477020 | Beclazone 250 inhaler (Teva UK Ltd) Beclometasone dipropionate<br>250microgram/1dose<br><br>Pressurised inhalation                                      | Beclometasone<br>Dipropionate |
| 1406  | 48324020 | Becotide 50 inhaler (GlaxoSmithKline UK Ltd)Beclometasone<br>dipropionate 50microgram/1dose                                                             | Beclometasone<br>Dipropionate |
| 24898 | 84019020 | Spacehaler BDP 100microgram/actuation Spacehaler (Celltech<br>Pharma Europe Ltd) Beclometasone Dipropionate<br><br>100microgram/actuation               | Beclometasone<br>Dipropionate |
| 1242  | 69244020 | Beclometasone 250micrograms/dose inhaler Beclometasone<br>dipropionate                                                                                  | Beclometasone<br>Dipropionate |
| 62341 | 02839020 | Becotide 50 inhaler (Dowelhurst Ltd) Beclometasone dipropionate                                                                                         | Beclometasone<br>Dipropionate |
| 1258  | 67266020 | Becotide 200 inhaler (GlaxoSmithKline UK Ltd) Beclometasone<br>dipropionate                                                                             | Beclometasone<br>Dipropionate |
| 16158 | 1161020  | Clenil Modulite 50micrograms/dose inhaler (Chiesi Ltd)<br>Beclometasone dipropionate                                                                    | Beclometasone<br>Dipropionate |
| 99    | 57212020 | Becotide 100 inhaler(GlaxoSmithKline UK Ltd) Beclometasone<br>dipropionate                                                                              | Beclometasone<br>Dipropionate |
| 13037 | 80128020 | Pulvinal Beclometasone Dipropionate 200micrograms/dose dry<br>powder inhaler (Chiesi Ltd)                                                               | Beclometasone<br>Dipropionate |
| 54207 | 10721020 | Qvar 50 inhaler (DE Pharmaceuticals) Beclometasone dipropionate                                                                                         | Beclometasone<br>Dipropionate |
| 21005 | 91159020 | Beclometasone 250micrograms/dose inhaler CFC free<br>Beclometasone dipropionate                                                                         | Beclometasone<br>Dipropionate |
| 2160  | 74421020 | Beclometasone 50micrograms/dose breath actuated inhaler<br><br>Beclometasone dipropionate 50microgram/1dose                                             | Beclometasone<br>Dipropionate |

|       |          |                                                                                                                                                                           |                            |
|-------|----------|---------------------------------------------------------------------------------------------------------------------------------------------------------------------------|----------------------------|
| 67234 | 02845020 | Becotide 100 inhaler (Waymade Healthcare Plc) Beclometasone dipropionate<br>Beclometasone dipropionate                                                                    | Beclometasone Dipropionate |
| 14524 | 81511020 | Bdp 250microgram/actuation Spacehaler (Celltech Pharma Europe Ltd) Beclometasone Dipropionate                                                                             | Beclometasone Dipropionate |
| 14321 | 91157020 | Beclometasone 200micrograms/dose inhaler CFC free<br>Beclometasone Dipropionate 200micrograms/actuation                                                                   | Beclometasone Dipropionate |
| 9477  | 85796020 | Asmabec 100microgram/actuation Spacehaler (Celltech Pharma Europe Ltd) Beclometasone Dipropionate<br><br>100microgram/actuation<br><br>Spacehaler<br><br>Inhalation       | Beclometasone Dipropionate |
| 1951  | 68211020 | Becodisks 400microgram Disc (Allen & Hanburys Ltd)<br>Beclometasone Dipropionate 400microgram                                                                             | Beclometasone Dipropionate |
| 51681 | 10726020 | Becodisks 400microgram Disc (Allen & Hanburys Ltd)<br>Beclometasone Dipropionate 400microgram Disc Inhalation                                                             | Beclometasone Dipropionate |
| 47943 | 99655020 | Beclazone easi-breathe (roi) 100microgram/actuation Pressurised inhalation (Ivax Pharmaceuticals Ireland)<br><br>Beclometasone Dipropionate                               | Beclometasone Dipropionate |
| 25204 | 60177020 | Beclometasone 100micrograms/dose inhaler (A A H Pharmaceuticals Ltd) Beclometasone dipropionate<br><br>100microgram/1dose<br><br>Pressurised inhalation<br><br>Inhalation | Beclometasone Dipropionate |
| 4499  | 54706020 | Aerobec 250microgram/actuation Pressurised inhalation (Meda Pharmaceuticals Ltd)                                                                                          | Beclometasone Dipropionate |
| 11732 | 86878020 | Beclometasone 50micrograms/dose breath actuated inhaler CFC free                                                                                                          | Beclometasone Dipropionate |
| 14567 | 85881020 | Asmabec 250 Clickhaler (Focus Pharmaceuticals Ltd)<br><br>Beclometasone dipropionate                                                                                      | Beclometasone Dipropionate |
| 9577  | 85879020 | Asmabec 50 Clickhaler (Focus Pharmaceuticals Ltd)<br><br>Beclometasone dipropionate                                                                                       | Beclometasone Dipropionate |
| 51415 | 10720020 | Qvar 50 inhaler (Mawdsley-Brooks & Company Ltd)<br><br>Beclometasone dipropionate                                                                                         | Beclometasone Dipropionate |
| 33849 | 63536020 | Beclometasone 100microgram/actuation Inhalation powder (Neo Laboratories Ltd)                                                                                             | Beclometasone Dipropionate |
| 1734  | 74422020 | Beclometasone 100micrograms/dose breath actuated inhaler<br><br>Beclometasone dipropionate                                                                                | Beclometasone Dipropionate |
| 3743  | 48110020 | Filair 50 inhaler (Meda Pharmaceuticals Ltd)Beclometasone dipropionate 50microgram/1dose Pressurised inhalation                                                           | Beclometasone Dipropionate |
| 3993  | 54871020 | Filair Forte 250micrograms/dose inhaler (Meda Pharmaceuticals Ltd)<br>Beclometasone dipropionate                                                                          | Beclometasone Dipropionate |

|       |          |                                                                                                                                                                                                                                                                |                            |
|-------|----------|----------------------------------------------------------------------------------------------------------------------------------------------------------------------------------------------------------------------------------------------------------------|----------------------------|
|       |          | 250microgram/1dose                                                                                                                                                                                                                                             |                            |
| 13815 | 82720020 | Beclazone 100microgram/actuation Inhalation powder (Actavis UK Ltd) Beclometasone dipropionate 100microgram/1dose Pressurised inhalation                                                                                                                       | Beclometasone Dipropionate |
| 30238 | 61523020 | Beclometasone 50microgram/actuation Pressurised inhalation (Approved Prescription Services Ltd) Beclometasone dipropionate<br>50microgram/1dose Pressurised inhalation                                                                                         | Beclometasone Dipropionate |
| 17654 | 89688020 | Easyhaler Beclometasone 200micrograms/dose dry powder inhaler (Orion Pharma (UK) Ltd) Beclometasone dipropionate<br>200microgram/1dose                                                                                                                         | Beclometasone Dipropionate |
| 11198 | 81505020 | Beclometasone 50 micrograms/actuation vortex inhaler<br>Beclometasone Dipropionate 50micrograms/actuation Vortex Metered Dose Inhaler<br><br>Inhalation<br><br>Beclometasone Dipropionate 50micrograms/actuation Vortex Metered Dose Inhaler<br><br>Inhalation | Beclometasone Dipropionate |
| 15326 | 91155020 | Beclometasone 100micrograms/dose inhaler CFC free<br>Beclometasone dipropionate 100microgram/1dose Pressurised inhalation                                                                                                                                      | Beclometasone Dipropionate |
| 5522  | 79503020 | Beclometasone 100micrograms/dose dry powder inhaler<br>Beclometasone dipropionate 100microgram/1dose                                                                                                                                                           | Beclometasone Dipropionate |
| 3927  | 48111020 | Filair 100 inhaler (Meda Pharmaceuticals Ltd) Beclometasone dipropionate 100microgram/1dose Pressurised inhalation                                                                                                                                             | Beclometasone Dipropionate |
| 56493 | 10722020 | Qvar 50micrograms/dose Easi-Breathe inhaler (Sigma Pharmaceuticals Plc) Beclometasone dipropionate<br>50microgram/1dose                                                                                                                                        | Beclometasone Dipropionate |
| 1727  | 84967020 | Becotide easi-breathe 50microgram/actuation Pressurised inhalation (Allen & Hanburys Ltd)                                                                                                                                                                      | Beclometasone Dipropionate |
| 5521  | 77000020 | Beclometasone 200micrograms/dose dry powder inhaler<br>Beclometasone dipropionate 200microgram/1dose                                                                                                                                                           | Beclometasone Dipropionate |
| 3363  | 57934020 | Becloforte 400microgram disks with Diskhaler (GlaxoSmithKline UK Ltd) Beclometasone dipropionate                                                                                                                                                               | Beclometasone Dipropionate |
| 35580 | 93039020 | Beclometasone 100microgram inhalation powder blisters with device<br>Beclometasone dipropionate<br>100microgram                                                                                                                                                | Beclometasone Dipropionate |
| 1885  | 81155020 | Beclazone 200 inhaler (Teva UK Ltd) Beclometasone dipropionate 200microgram/1dose<br><br>Pressurised inhalation<br><br>Inhalation                                                                                                                              | Beclometasone Dipropionate |
| 16584 | 91153020 | Beclometasone 50micrograms/dose inhaler CFC free                                                                                                                                                                                                               | Beclometasone Dipropionate |

|       |          |                                                                                                  |                            |
|-------|----------|--------------------------------------------------------------------------------------------------|----------------------------|
|       |          | Beclometasone dipropionate                                                                       |                            |
| 63585 | 75217020 | Beclometasone 50micrograms/dose inhaler (Almus Pharmaceuticals Ltd)                              | Beclometasone Dipropionate |
| 9233  | 69250020 | Beclometasone 200microgram inhalation powder capsules                                            | Beclometasone Dipropionate |
| 14757 | 80127020 | Pulvinal Beclometasone Dipropionate 100micrograms/dose dry powder inhaler (Chiesi Ltd)           | Beclometasone Dipropionate |
| 3947  | 53710020 | Becotide 100microgram Rotacaps (GlaxoSmithKline UK Ltd)                                          | Beclometasone Dipropionate |
| 35288 | 93057020 | Beclometasone 400microgram inhalation powder blisters                                            | Beclometasone Dipropionate |
| 35293 | 93047020 | Beclometasone 200microgram inhalation powder blisters with device                                | Beclometasone Dipropionate |
| 1725  | 79400020 | Beclazone 50 Easi-Breathe inhaler (Teva UK Ltd)                                                  | Beclometasone Dipropionate |
| 53480 | 10735020 | Qvar 100 Autohaler (Stephar (U.K.) Ltd)<br>Beclometasone dipropionate                            | Beclometasone Dipropionate |
| 18848 | 88502020 | Qvar 100micrograms/dose Easi-Breathe inhaler (Teva UK Ltd)                                       | Beclometasone Dipropionate |
| 2992  | 56475020 | Beclazone 50 inhaler (Teva UK Ltd)                                                               | Beclometasone Dipropionate |
| 19389 | 85795020 | Asmabec 50microgram/actuation Spacehaler (Celltech Pharma Europe Ltd)                            | Beclometasone Dipropionate |
| 13290 | 91163020 | Clenil Modulite 100micrograms/dose inhaler (Chiesi Ltd)                                          | Beclometasone Dipropionate |
| 34919 | 60176020 | Beclometasone 50micrograms/dose inhaler (A A H Pharmaceuticals Ltd)                              | Beclometasone Dipropionate |
| 1100  | 56476020 | Beclazone 100 inhaler (Teva UK Ltd)                                                              | Beclometasone Dipropionate |
| 28073 | 61525020 | Beclometasone 250microgram/actuation Pressurised inhalation (Approved Prescription Services Ltd) | Beclometasone Dipropionate |
| 2600  | 74423020 | Beclometasone 250micrograms/dose breath actuated inhaler<br>Beclometasone dipropionate           | Beclometasone Dipropionate |
| 1243  | 79402020 | Beclazone 250 Easi-Breathe inhaler (Teva UK Ltd)                                                 | Beclometasone Dipropionate |
| 35430 | 93051020 | Becodisks 200microgram with Diskhaler (GlaxoSmithKline UK Ltd)                                   | Beclometasone Dipropionate |
| 50129 | 10737020 | Qvar 100micrograms/dose Easi-Breathe inhaler (DE Pharmaceuticals)                                | Beclometasone Dipropionate |
| 41412 | 69256020 | Beclometasone 400micrograms/actuation inhaler<br>Beclometasone Dipropionate                      | Beclometasone Dipropionate |
| 41269 | 63923020 | Beclometasone 400 Cyclocaps (Teva UK Ltd)                                                        | Beclometasone Dipropionate |
| 2892  | 57935020 | Becloforte 400microgram disks (GlaxoSmithKline UK Ltd)                                           | Beclometasone Dipropionate |
| 35118 | 93059020 | Becodisks 400microgram with Diskhaler (GlaxoSmithKline UK Ltd)                                   | Beclometasone Dipropionate |
| 7964  | 63531020 | Beclometasone 50microgram/actuation Inhalation powder (Neo Laboratories Ltd)                     | Beclometasone Dipropionate |

|       |          |                                                                                              |                            |
|-------|----------|----------------------------------------------------------------------------------------------|----------------------------|
| 9571  | 81507020 | Beclometasone 250micrograms/actuation vortex inhaler<br>Beclometasone Dipropionate           | Beclometasone Dipropionate |
| 1552  | 84970020 | Becloforte easi-breathe 250microgram/actuation Pressurised inhalation (Allen & Hanburys Ltd) | Beclometasone Dipropionate |
| 19031 | 81510020 | Bdp 100microgram/actuation Spacehaler (Celltech Pharma Europe Ltd)                           | Beclometasone Dipropionate |
| 34794 | 65723020 | Beclometasone 200micrograms/dose inhaler (A A H Pharmaceuticals Ltd)                         | Beclometasone Dipropionate |
| 20825 | 84020020 | Spacehaler BDP 250microgram/actuation Spacehaler (Celltech Pharma Europe Ltd)                | Beclometasone Dipropionate |
| 2229  | 68209020 | Becodisks 100microgram Disc (Allen & Hanburys Ltd)                                           | Beclometasone Dipropionate |
| 896   | 84968020 | Becotide easi-breathe 100microgram/actuation Pressurised inhalation (Allen & Hanburys Ltd)   | Beclometasone Dipropionate |
| 10090 | 86870020 | Beclometasone 50micrograms/actuation extrafine particle cfc free inhaler                     | Beclometasone Dipropionate |
| 5804  | 76999020 | Beclometasone 250micrograms/dose dry powder inhaler<br>Beclometasone dipropionate            | Beclometasone Dipropionate |
| 56471 | 02827020 | Becodisks 200microgram (Mawdsley-Brooks & Company Ltd)                                       | Beclometasone Dipropionate |
| 61664 | 26859021 | Clenil Modulite 250micrograms/dose inhaler (Waymade Healthcare Plc)                          | Beclometasone Dipropionate |
| 34739 | 67073020 | Beclometasone 50micrograms/dose inhaler (Teva UK Ltd)                                        | Beclometasone Dipropionate |
| 48340 | 38603020 | Clenil Modulite 100micrograms/dose inhaler (Mawdsley-Brooks & Company Ltd)                   | Beclometasone Dipropionate |
| 35408 | 93045020 | Becodisks 100microgram (GlaxoSmithKline UK Ltd)                                              | Beclometasone Dipropionate |
| 62518 | 27040021 | Beclometasone 100micrograms/dose inhaler CFC free (Ennogen Healthcare Ltd)                   | Beclometasone Dipropionate |
| 28640 | 59873020 | Beclometasone 100microgram/actuation Inhalation powder (Actavis UK Ltd)                      | Beclometasone Dipropionate |
| 38    | 69246020 | Beclometasone 100micrograms/dose inhaler                                                     | Beclometasone Dipropionate |
| 11497 | 77001020 | Beclometasone 400micrograms/dose dry powder inhaler                                          | Beclometasone Dipropionate |
| 7653  | 69251020 | Beclometasone 400microgram inhalation powder capsules                                        | Beclometasone Dipropionate |
| 29325 | 58817020 | Beclometasone 250micrograms/dose inhaler (Mylan Ltd)                                         | Beclometasone Dipropionate |
| 21482 | 58819020 | Beclometasone 100micrograms/dose inhaler (Mylan Ltd)                                         | Beclometasone Dipropionate |
| 35652 | 93041020 | Beclometasone 100microgram inhalation powder blisters                                        | Beclometasone Dipropionate |
| 28761 | 84018020 | Spacehaler BDP 50microgram/actuation Spacehaler (Celltech Pharma Europe Ltd)                 | Beclometasone Dipropionate |
| 26063 | 67076020 | Beclometasone 100micrograms/dose inhaler (Teva UK Ltd)                                       | Beclometasone Dipropionate |
| 51480 | 10736020 | Qvar 100 Autohaler (DE Pharmaceuticals)                                                      | Beclometasone Dipropionate |
| 35107 | 93055020 | Beclometasone 400microgram inhalation powder blisters with device                            | Beclometasone Dipropionate |

|       |          |                                                                                                           |                            |
|-------|----------|-----------------------------------------------------------------------------------------------------------|----------------------------|
| 35071 | 93053020 | Becodisks 200microgram (GlaxoSmithKline UK Ltd)<br>Beclometasone dipropionate                             | Beclometasone Dipropionate |
| 4365  | 69622020 | Beclometasone 100micrograms disc                                                                          | Beclometasone Dipropionate |
| 39200 | 95879020 | AeroBec Forte 250 Autohaler (Meda Pharmaceuticals Ltd)                                                    | Beclometasone Dipropionate |
| 67735 | 99657020 | Beclazone easi-breathe (roi) 250microgram/actuation Pressurised inhalation (Ivax Pharmaceuticals Ireland) | Beclometasone Dipropionate |
| 18394 | 81509020 | Bdp 50microgram/actuation Spacehaler (Celltech Pharma Europe Ltd)                                         | Beclometasone Dipropionate |
| 34315 | 59874020 | Beclometasone 250microgram/actuation Inhalation powder (Actavis UK Ltd)                                   | Beclometasone Dipropionate |
| 895   | 79401020 | Beclazone 100 Easi-Breathe inhaler (Teva UK Ltd)                                                          | Beclometasone Dipropionate |
| 5992  | 79502020 | Beclometasone 50micrograms/dose dry powder inhaler                                                        | Beclometasone Dipropionate |
| 3119  | 79444020 | Becloforte integra 250microgram/actuation Inhaler with compact spacer (Glaxo Laboratories Ltd)            | Beclometasone Dipropionate |
| 50287 | 10725020 | Qvar 100 inhaler (DE Pharmaceuticals)                                                                     | Beclometasone Dipropionate |
| 3075  | 53712020 | Becotide 400microgram Rotacaps (GlaxoSmithKline UK Ltd)                                                   | Beclometasone Dipropionate |
| 67265 | 02826020 | Becodisks 200microgram (Lexon (UK) Ltd)                                                                   | Beclometasone Dipropionate |
| 3018  | 69245020 | Beclometasone 50micrograms/dose inhaler                                                                   | Beclometasone Dipropionate |
| 3150  | 86871020 | Beclometasone 100micrograms/actuation extrafine particle cfc free inhaler                                 | Beclometasone Dipropionate |
| 19401 | 79501020 | Beclometasone 250micrograms/actuation inhaler and compact spacer                                          | Beclometasone Dipropionate |
| 49367 | 38602020 | Clenil Modulite 50micrograms/dose inhaler (Mawdsley-Brooks & Company Ltd)                                 | Beclometasone Dipropionate |
| 4413  | 86884020 | Qvar 100 Autohaler (Teva UK Ltd)                                                                          | Beclometasone Dipropionate |
| 32874 | 59872020 | Beclometasone 50microgram/actuation Inhalation powder (Actavis UK Ltd)                                    | Beclometasone Dipropionate |
| 30210 | 67080020 | Beclometasone 250micrograms/dose inhaler (Teva UK Ltd)                                                    | Beclometasone Dipropionate |
| 2335  | 86874020 | Qvar 100 inhaler (Teva UK Ltd)                                                                            | Beclometasone Dipropionate |
| 46157 | 63918020 | Beclometasone 200 Cyclocaps (Teva UK Ltd)                                                                 | Beclometasone Dipropionate |
| 4601  | 85880020 | Asmabec 100 Clickhaler (Focus Pharmaceuticals Ltd)                                                        | Beclometasone Dipropionate |
| 16151 | 91165020 | Clenil Modulite 200micrograms/dose inhaler (Chiesi Ltd)                                                   | Beclometasone Dipropionate |
| 2159  | 54705020 | AeroBec 50 Autohaler (Meda Pharmaceuticals Ltd)                                                           | Beclometasone Dipropionate |
| 52806 | 10732020 | Qvar 100 Autohaler (Lexon (UK) Ltd)                                                                       | Beclometasone Dipropionate |
| 35106 | 93043020 | Becodisks 100microgram with Diskhaler (GlaxoSmithKline UK Ltd)                                            | Beclometasone Dipropionate |
| 1537  | 53711020 | Becotide 200microgram Rotacaps (GlaxoSmithKline UK Ltd)                                                   | Beclometasone Dipropionate |

|       |          |                                                                                                          |                            |
|-------|----------|----------------------------------------------------------------------------------------------------------|----------------------------|
| 1259  | 69255020 | Beclometasone 200micrograms/dose inhaler                                                                 | Beclometasone Dipropionate |
| 9599  | 82719020 | Beclazone 50microgram/actuation Inhalation powder (Actavis UK Ltd)                                       | Beclometasone Dipropionate |
| 1236  | 48309020 | Becloforte 250micrograms/dose inhaler (GlaxoSmithKline UK Ltd)                                           | Beclometasone Dipropionate |
| 3546  | 86873020 | Qvar 50 inhaler (Teva UK Ltd)                                                                            | Beclometasone Dipropionate |
| 35113 | 93049020 | Beclometasone 200microgram inhalation powder blisters                                                    | Beclometasone Dipropionate |
| 14736 | 80129020 | Pulvinal Beclometasone Dipropionate 400micrograms/dose dry powder inhaler (Chiesi Ltd)                   | Beclometasone Dipropionate |
| 8111  | 48310020 | Becloforte vm 250microgram/actuation VM pack (Allen & Hanburys Ltd)                                      | Beclometasone Dipropionate |
| 3220  | 86883020 | Qvar 50 Autohaler (Teva UK Ltd)<br>Beclometasone dipropionate                                            | Beclometasone Dipropionate |
| 883   | 68210020 | Becodisks 200microgram Disc (Allen & Hanburys Ltd)                                                       | Beclometasone Dipropionate |
| 35299 | 93063020 | Becodisks 400microgram (GlaxoSmithKline UK Ltd)                                                          | Beclometasone Dipropionate |
| 2893  | 69623020 | Beclometasone 200micrograms disc Beclometasone Dipropionate 200micrograms Disc Inhalation                | Beclometasone Dipropionate |
| 4803  | 82721020 | Beclazone 250microgram/actuation Inhalation powder (Actavis UK Ltd)                                      | Beclometasone Dipropionate |
| 56462 | 02818020 | Becodisks 400microgram (Waymade Healthcare Plc)                                                          | Beclometasone Dipropionate |
| 1861  | 54707020 | AeroBec 100 Autohaler (Meda Pharmaceuticals Ltd)                                                         | Beclometasone Dipropionate |
| 34859 | 63539020 | Beclometasone 250microgram/actuation Inhalation powder (Neo Laboratories Ltd)                            | Beclometasone Dipropionate |
| 51234 | 10727020 | Qvar 100 inhaler (Waymade Healthcare Plc)                                                                | Beclometasone Dipropionate |
| 27679 | 61524020 | Beclometasone 100microgram/actuation Pressurised inhalation (Approved Prescription Services Ltd)         | Beclometasone Dipropionate |
| 15706 | 81506020 | Beclometasone 100 micrograms/actuation vortex inhaler                                                    | Beclometasone Dipropionate |
| 14590 | 85797020 | Asmabec 250microgram/actuation Spacehaler (Celltech Pharma Europe Ltd)                                   | Beclometasone Dipropionate |
| 48709 | 10734020 | Qvar 100micrograms/dose Easi-Breathe inhaler (Sigma Pharmaceuticals Plc)                                 | Beclometasone Dipropionate |
| 9921  | 86879020 | Beclometasone 100micrograms/dose breath actuated inhaler CFC free                                        | Beclometasone Dipropionate |
| 10254 | 84120020 | Mometasone 400micrograms/dose dry powder inhaler Mometasone furoate 400microgram/1dose Inhalation powder | Mometasone Furoate         |
| 17590 | 80362020 | Asmanex 400micrograms/dose Twisthaler (Merck Sharp & Dohme Ltd)                                          | Mometasone Furoate         |
| 16018 | 80792020 | Mometasone 200micrograms/dose dry powder inhaler                                                         | Mometasone Furoate         |
| 16433 | 85228020 | Asmanex 200micrograms/dose Twisthaler (Merck Sharp & Dohme Ltd)                                          | Mometasone Furoate         |
| 21224 | 88720020 | Alvesco 80 inhaler (Takeda UK Ltd) Ciclesonide 80microgram/1dose Pressurised inhalation                  | Ciclesonide                |
| 7356  | 88708020 | Ciclesonide 80micrograms/dose inhaler CFC free                                                           | Ciclesonide                |
| 6839  | 88722020 | Alvesco 160 inhaler (Takeda UK Ltd)                                                                      | Ciclesonide                |
| 10102 | 88716020 | Ciclesonide 160micrograms/dose inhaler CFC free                                                          | Ciclesonide                |



|       |          |                                                                                                                                                                                                                  |                     |
|-------|----------|------------------------------------------------------------------------------------------------------------------------------------------------------------------------------------------------------------------|---------------------|
| 60920 | 10891020 | Atrovent 20micrograms/dose inhaler CFC free (Sigma Pharmaceuticals Plc)                                                                                                                                          | Ipratropium Bromide |
| 43105 | 98206020 | Atrovent 40microgram Aerocaps with AeroHaler (Boehringer Ingelheim Ltd)                                                                                                                                          | Ipratropium Bromide |
| 3306  | 58545020 | Atrovent Forte 40micrograms/dose inhaler (Boehringer Ingelheim Ltd)                                                                                                                                              | Ipratropium Bromide |
| 43090 | 98208020 | Atrovent 40microgram Aerocaps (Boehringer Ingelheim Ltd)                                                                                                                                                         | Ipratropium Bromide |
| 1697  | 75004020 | Atrovent 20micrograms/dose Autohaler (Boehringer Ingelheim Ltd)<br>Ipratropium bromide 20microgram/1dose Pressurised inhalation                                                                                  | Ipratropium Bromide |
| 1409  | 63608020 | Ipratropium bromide 20micrograms/dose inhaler                                                                                                                                                                    | Ipratropium Bromide |
| 57557 | 10892020 | Atrovent 20micrograms/dose inhaler CFC free (Lexon (UK) Ltd)<br>Ipratropium bromide 20microgram/1dose Pressurised inhalation                                                                                     | Ipratropium Bromide |
| 2994  | 72270020 | Atrovent aerocaps 40microgram Inhalation powder (Boehringer Ingelheim Ltd)                                                                                                                                       | Ipratropium Bromide |
| 23709 | 88636020 | Ipratropium 500micrograms/2ml nebuliser liquid Steri-Neb unit dose vials (Teva UK Ltd)                                                                                                                           | Ipratropium Bromide |
| 6522  | 87822020 | Ipratropium bromide 20micrograms/dose inhaler CFC free                                                                                                                                                           | Ipratropium Bromide |
| 50810 | 39925020 | Atrovent 20micrograms/dose inhaler CFC free (DE Pharmaceuticals)                                                                                                                                                 | Ipratropium Bromide |
| 4268  | 63612020 | Ipratropium bromide 40micrograms/dose inhaler Ipratropium bromide 40microgram/1dose Pressurised inhalation                                                                                                       | Ipratropium Bromide |
| 6512  | 87824020 | Atrovent 20micrograms/dose inhaler CFC free (Boehringer Ingelheim Ltd)                                                                                                                                           | Ipratropium Bromide |
| 11779 | 72265020 | Ipratropium bromide 40microgram inhalation powder capsules with device                                                                                                                                           | Ipratropium Bromide |
| 6081  | 63609020 | Ipratropium bromide 20micrograms/dose breath actuated inhaler                                                                                                                                                    | Ipratropium Bromide |
| 534   | 48252020 | Atrovent 20micrograms/dose inhaler (Boehringer Ingelheim Ltd)                                                                                                                                                    | Ipratropium Bromide |
| 8333  | 72266020 | Ipratropium bromide 40microgram inhalation powder capsules                                                                                                                                                       | Ipratropium Bromide |
| 9681  | 72269020 | Atrovent aerohaler 40microgram Inhalation powder (Boehringer Ingelheim Ltd) Ipratropium bromide 40microgram Inhalation powder<br>Antimuscarinic Bronchodilators<br><br>Inhalation Antimuscarinic Bronchodilators | Ipratropium Bromide |
| 6050  | 84108020 | Spiriva 18 microgram Capsule (Boehringer Ingelheim Ltd) Tiotropium Bromide<br><br>18 Microgram Capsule<br><br>Inhalation                                                                                         | Tiotropium Bromide  |
| 36869 | 94073020 | Spiriva Respimat 2.5micrograms/dose solution for inhalation cartridge with device (Boehringer Ingelheim Ltd)                                                                                                     | Tiotropium Bromide  |
| 51967 | 21580020 | Spiriva 18microgram inhalation powder capsules (Mawdsley-Brooks & Company Ltd)                                                                                                                                   | Tiotropium Bromide  |
| 35000 | 92699020 | Spiriva 18microgram inhalation powder capsules (Boehringer Ingelheim Ltd)                                                                                                                                        | Tiotropium Bromide  |
| 34995 | 92697020 | Spiriva 18microgram inhalation powder capsules with HandiHaler (Boehringer Ingelheim Ltd)                                                                                                                        | Tiotropium Bromide  |
| 64232 | 44715021 | Tiotropium bromide 2.5micrograms/dose solution for inhalation cartridge with device CFC free (AM Distributions (Yorkshire) Ltd)                                                                                  | Tiotropium Bromide  |
| 50577 | 21583020 | Spiriva 18microgram inhalation powder capsules with HandiHaler (DE Pharmaceuticals)                                                                                                                              | Tiotropium Bromide  |
| 36864 | 94071020 | Tiotropium bromide 2.5micrograms/dose solution for inhalation cartridge with device CFC free                                                                                                                     | Tiotropium Bromide  |
| 746   | 73050020 | Tiotropium 18 microgram Capsule inhalation<br><br>Tiotropium Bromide                                                                                                                                             | Tiotropium Bromide  |

|       |          |                                                                                                                                                                                                               |                                                          |
|-------|----------|---------------------------------------------------------------------------------------------------------------------------------------------------------------------------------------------------------------|----------------------------------------------------------|
|       |          | 18 Microgram                                                                                                                                                                                                  |                                                          |
| 61582 | 26397021 | Spiriva Respimat 2.5micrograms/dose solution for inhalation cartridge with device (Waymade Healthcare Plc)                                                                                                    | Tiotropium Bromide                                       |
| 35011 | 92695020 | Tiotropium bromide 18microgram inhalation powder capsules<br>Tiotropium Bromide Monohydrate 18 MicrogramsInhalation Powder Capsules (refill)                                                                  | Tiotropium Bromide                                       |
| 35014 | 92693020 | 18 MicrogramsInhalation Powder Capsules (refill)<br>Tiotropium bromide 18microgram inhalation powder capsules with device Tiotropium Bromide Monohydrate 18 Micrograms Inhalation Powder Capsules With Device | Tiotropium Bromide                                       |
| 2437  | 74071020 | Oxitropium bromide 100micrograms/dose inhaler Oxitropium bromide 100microgram/1dose Pressurised inhalation                                                                                                    | Oxitropium Bromide                                       |
| 9658  | 74072020 | Oxitropium bromide 100micrograms/dose breath actuated inhaler                                                                                                                                                 | Oxitropium Bromide                                       |
| 3039  | 74069020 | Oxivent 100micrograms/dose inhaler (Boehringer Ingelheim Ltd)                                                                                                                                                 | Oxitropium Bromide                                       |
| 3850  | 75001020 | Oxivent 100micrograms/dose Autohaler (Boehringer Ingelheim Ltd)                                                                                                                                               | Oxitropium Bromide                                       |
| 49227 | 44134020 | Acridinium bromide 375micrograms/dose dry powder inhaler<br><br>Acridinium bromide                                                                                                                            | Acridinium Bromide                                       |
| 49228 | 44135020 | Eklira 322micrograms/dose Genuair (AstraZeneca UK Ltd)<br>Acridinium bromide 375microgram/1dose                                                                                                               | Acridinium Bromide                                       |
| 63992 | 44771021 | Eklira 322micrograms/dose Genuair (Waymade Healthcare Plc)                                                                                                                                                    | Acridinium bromide                                       |
| 37432 | 94307020 | Fostair 100micrograms/dose / 6micrograms/dose inhaler (Chiesi Ltd)                                                                                                                                            | Beclometasone dipropionate/Formoterol fumarate dihydrate |
| 37470 | 94305020 | Beclometasone 100micrograms/dose / Formoterol 6micrograms/dose inhaler CFC free                                                                                                                               | Beclometasone dipropionate/Formoterol fumarate dihydrate |
| 65894 | 60895021 | Beclometasone 200micrograms/dose / Formoterol 6micrograms/dose dry powder inhaler                                                                                                                             | Beclometasone dipropionate/Formoterol fumarate dihydrate |
| 62030 | 29629021 | Beclometasone 100micrograms/dose / Formoterol 6micrograms/dose dry powder inhaler                                                                                                                             | Beclometasone dipropionate/Formoterol fumarate dihydrate |
| 65658 | 60896021 | Fostair NEXThaler 200micrograms/dose / 6micrograms/dose dry powder inhaler (Chiesi Ltd)                                                                                                                       | Beclometasone dipropionate/Formoterol fumarate dihydrate |
| 61644 | 29630021 | Fostair NEXThaler 100micrograms/dose / 6micrograms/dose dry powder inhaler (Chiesi Ltd)                                                                                                                       | Beclometasone dipropionate/Formoterol fumarate dehydrate |
| 50739 | 14019020 | Symbicort 400/12 Turbohaler (Mawdsley-Brooks & Company Ltd)                                                                                                                                                   | Budesonide/Formoterol fumarate dehydrate                 |
| 6796  | 86176020 | Budesonide 200micrograms/dose / Formoterol 6micrograms/dose dry powder inhaler                                                                                                                                | Budesonide/Formoterol fumarate dihydrate                 |
| 61782 | 27233021 | DuoResp Spiromax 160micrograms/dose / 4.5micrograms/dose dry powder inhaler (Teva UK Ltd)                                                                                                                     | Budesonide/Formoterol fumarate dihydrate                 |
| 51759 | 00048020 | Symbicort 200/6 Turbohaler (Mawdsley-Brooks & Company Ltd)                                                                                                                                                    | Budesonide/Formoterol fumarate dihydrate                 |
| 7013  | 81547020 | Symbicort 100/6 Turbohaler (AstraZeneca UK Ltd)                                                                                                                                                               | Budesonide/Formoterol fumarate dihydrate                 |
| 68034 | 00049020 | Symbicort 200/6 Turbohaler (Necessity Supplies Ltd)                                                                                                                                                           | Budesonide/Formoterol fumarate dehydrate                 |

|       |          |                                                                                                      |                                                      |
|-------|----------|------------------------------------------------------------------------------------------------------|------------------------------------------------------|
| 51570 | 00046020 | Symbicort 200/6 Turbohaler (DE Pharmaceuticals)                                                      | Budesonide/Formoterol fumarate dihydrate             |
| 53491 | 00047020 | Symbicort 200/6 Turbohaler (Sigma Pharmaceuticals Plc)                                               | Budesonide/Formoterol fumarate dihydrate             |
| 71284 | 78502021 | Fobumix Easyhaler 320micrograms/dose / 9micrograms/dose dry powder inhaler (Orion Pharma (UK) Ltd)   | Budesonide/Formoterol fumarate dihydrate             |
| 71371 | 00050020 | Symbicort 100/6 Turbohaler (Waymade Healthcare Plc)                                                  | Budesonide/Formoterol fumarate dihydrate             |
| 71915 | 78958021 | Fobumix Easyhaler 160micrograms/dose / 4.5micrograms/dose dry powder inhaler (Orion Pharma (UK) Ltd) | Budesonide/Formoterol fumarate dihydrate             |
| 10218 | 86175020 | Budesonide 100micrograms/dose / Formoterol 6micrograms/dose dry powder inhaler                       | Budesonide/Formoterol fumarate dihydrate             |
| 6325  | 81548020 | Symbicort 200/6 Turbohaler (AstraZeneca UK Ltd)                                                      | Budesonide/Formoterol fumarate dihydrate             |
| 6780  | 79213020 | Symbicort 400/12 Turbohaler (AstraZeneca UK Ltd)                                                     | Budesonide/Formoterol fumarate dihydrate             |
| 53237 | 14017020 | Symbicort 400/12 Turbohaler (DE Pharmaceuticals)                                                     | Budesonide/Formoterol fumarate dihydrate             |
| 6746  | 76616020 | Budesonide 400micrograms/dose / Formoterol 12micrograms/dose dry powder inhaler                      | Budesonide/Formoterol fumarate dehydrate             |
| 50945 | 00054020 | Symbicort 100/6 Turbohaler (Mawdsley-Brooks & Company Ltd)                                           | Budesonide/Formoterol fumarate dihydrate             |
| 71354 | 14020020 | Symbicort 400/12 Turbohaler (Necessity Supplies Ltd)                                                 | Budesonide/Formoterol fumarate dihydrate             |
| 61666 | 27378021 | DuoResp Spiromax 320micrograms/dose / 9micrograms/dose dry powder inhaler (Teva UK Ltd)              | Budesonide/Formoterol fumarate dihydrate             |
| 49114 | 00053020 | Symbicort 100/6 Turbohaler (Sigma Pharmaceuticals Plc)                                               | Budesonide/Formoterol fumarate dihydrate             |
| 51209 | 44172020 | Fluticasone 125micrograms/dose / Formoterol 5micrograms/dose inhaler CFC free                        | Fluticasone propionate/Formoterol fumarate dihydrate |
| 64638 | 52509021 | Flutiform 125micrograms/dose / 5micrograms/dose inhaler (Waymade Healthcare Plc)                     | Fluticasone propionate/Formoterol fumarate dihydrate |
| 48666 | 44175020 | Flutiform 250micrograms/dose / 10micrograms/dose inhaler (Napp Pharmaceuticals Ltd)                  | Fluticasone propionate/Formoterol fumarate dihydrate |
| 66448 | 52510021 | Flutiform 250micrograms/dose / 10micrograms/dose inhaler (Waymade Healthcare Plc)                    | Fluticasone propionate/Formoterol fumarate dihydrate |
| 68175 | 52511021 | Flutiform 50micrograms/dose / 5micrograms/dose inhaler (Waymade Healthcare Plc)                      | Fluticasone propionate/Formoterol fumarate dihydrate |
| 50689 | 44177020 | Flutiform 50micrograms/dose / 5micrograms/dose inhaler (Napp Pharmaceuticals Ltd)                    | Fluticasone propionate/Formoterol fumarate dihydrate |
| 51270 | 44176020 | Fluticasone 50micrograms/dose / Formoterol 5micrograms/dose inhaler CFC free                         | Fluticasone propionate/Formoterol fumarate dehydrate |
| 50036 | 44173020 | Flutiform 125micrograms/dose / 5micrograms/dose inhaler (Napp Pharmaceuticals Ltd)                   | Fluticasone propionate/Formoterol fumarate dihydrate |
| 49868 | 44174020 | Fluticasone 250micrograms/dose / Formoterol 10micrograms/dose inhaler CFC free                       | Fluticasone propionate/Formoterol fumarate dihydrate |

|       |          |                                                                                                                         |                                                 |
|-------|----------|-------------------------------------------------------------------------------------------------------------------------|-------------------------------------------------|
| 51394 | 02760020 | Seretide 500 Accuhaler (Waymade Healthcare Plc)                                                                         | Salmeterol xinafoate/Fluticasone propionate     |
| 6616  | 86896020 | Salmeterol 25micrograms with fluticasone 50micrograms CFC free inhaler                                                  | Salmeterol Xinafoate/Fluticasone Propionate     |
| 5942  | 85657020 | Salmeterol 50micrograms with fluticasone 250micrograms CFC free inhaler                                                 | Salmeterol Xinafoate/Fluticasone Propionate     |
| 67101 | 60670021 | Fluticasone propionate 500micrograms/dose / Salmeterol 50micrograms/dose dry powder inhaler (A A H Pharmaceuticals Ltd) | Salmeterol xinafoate/Fluticasone propionate     |
| 13273 | 85660020 | Fluticasone propionate 100micrograms/dose / Salmeterol 50micrograms/dose dry powder inhaler                             | Salmeterol xinafoate/Fluticasone propionate     |
| 5864  | 86898020 | Salmeterol 25micrograms with fluticasone 250micrograms CFC free inhaler                                                 | Salmeterol Xinafoate/Fluticasone Propionate     |
| 51861 | 02764020 | Seretide 500 Accuhaler (Mawdsley-Brooks & Company Ltd)                                                                  | Salmeterol xinafoate/Fluticasone propionate     |
| 53230 | 02755020 | Seretide 250 Accuhaler (DE Pharmaceuticals)                                                                             | Salmeterol xinafoate/Fluticasone propionate     |
| 11410 | 85662020 | Fluticasone propionate 500micrograms/dose / Salmeterol 50micrograms/dose dry powder inhaler                             | Salmeterol xinafoate/Fluticasone propionate     |
| 61280 | 02753020 | Seretide 250 Accuhaler (Waymade Healthcare Plc)                                                                         | Salmeterol xinafoate/Fluticasone propionate     |
| 6938  | 85656020 | Salmeterol 50micrograms with fluticasone 100micrograms dry powder inhaler                                               | Salmeterol Xinafoate/Fluticasone Propionate     |
| 62126 | 02747020 | Seretide 100 Accuhaler (DE Pharmaceuticals)                                                                             | Salmeterol xinafoate/Fluticasone propionate     |
| 68983 | 71438021 | Aerivio Spiromax 50micrograms/dose / 500micrograms/dose dry powder inhaler (Teva UK Ltd)                                | Salmeterol xinafoate/Fluticasone propionate3666 |
| 5558  | 85658020 | Salmeterol 50micrograms with fluticasone 500micrograms CFC free inhaler                                                 | Salmeterol Xinafoate/Fluticasone Propionate     |
| 55677 | 02763020 | Seretide 500 Accuhaler (Lexon (UK) Ltd)                                                                                 | Salmeterol xinafoate/Fluticasone propionate     |
| 13040 | 85661020 | Fluticasone propionate 250micrograms/dose / Salmeterol 50micrograms/dose dry powder inhaler                             | Salmeterol xinafoate/Fluticasone propionate     |
| 6569  | 86897020 | Salmeterol 25micrograms with fluticasone 125micrograms CFC free inhaler                                                 | Salmeterol Xinafoate/Fluticasone Propionate     |
| 638   | 79544020 | Seretide 250 Accuhaler (GlaxoSmithKline UK Ltd)                                                                         | Salmeterol xinafoate/Fluticasone propionate     |

|       |          |                                                                                                   |                                             |
|-------|----------|---------------------------------------------------------------------------------------------------|---------------------------------------------|
| 665   | 85668020 | Seretide 100 Accuhaler (GlaxoSmithKline UK Ltd)                                                   | Salmeterol xinafoate/Fluticasone propionate |
| 63945 | 02757020 | Seretide 250 Accuhaler (Lexon (UK) Ltd)                                                           | Salmeterol xinafoate/Fluticasone propionate |
| 68495 | 02765020 | Seretide 500 Accuhaler (Necessity Supplies Ltd)                                                   | Salmeterol xinafoate/Fluticasone propionate |
| 51593 | 02766020 | Seretide 500 Accuhaler (DE Pharmaceuticals)                                                       | Salmeterol xinafoate/Fluticasone propionate |
| 53283 | 02745020 | Seretide 100 Accuhaler (Waymade Healthcare Plc)                                                   | Salmeterol xinafoate/Fluticasone propionate |
| 50560 | 02756020 | Seretide 250 Accuhaler (Sigma Pharmaceuticals Plc)                                                | Salmeterol xinafoate/Fluticasone propionate |
| 59899 | 21595021 | Fluticasone furoate 184micrograms/dose / Vilanterol 22micrograms/dose dry powder inhaler          | Fluticasone furoate/Vilanterol              |
| 59327 | 21598021 | Relvar Ellipta 92micrograms/dose / 22micrograms/dose dry powder inhaler (GlaxoSmithKline UK Ltd)  | Fluticasone furoate/Vilanterol              |
| 59439 | 21597021 | Fluticasone furoate 92micrograms/dose / Vilanterol 22micrograms/dose dry powder inhaler           | Fluticasone furoate/Vilanterol              |
| 59573 | 21596021 | Relvar Ellipta 184micrograms/dose / 22micrograms/dose dry powder inhaler (GlaxoSmithKline UK Ltd) | Fluticasone furoate/Vilanterol              |
